# Supplementary material
Source: PubMed Central journal article supplement (PMC4307922)
Supplement: NIHMS526409-supplement-Supplement1.pdf [file NIHMS526409-supplement-Supplement1.pdf]

## Supplementary Appendix

This appendix has been provided by the authors to give readers additional information about their work.

Supplement to: Aberle DR, DeMello S, Berg CD, et al. Results of the two incidence screenings in the National Lung Screening Trial. *N Engl J Med* 2013;369:920-31. DOI: 10.1056/NEJMoa1208962

## SUPPLEMENTAL APPENDIX

This appendix is provided by the Authors to give readers additional information about their work.

Supplement to: **Results of the Two Incidence Screens of the National Lung Screening Trial**  
The National Lung Screening Trial Research Team.

|                                                                                                                                       | <b>Page</b> |
|---------------------------------------------------------------------------------------------------------------------------------------|-------------|
| Rules Determining the Presence or Absence of Lung Cancer                                                                              | 2           |
| Supplemental Table S1: <b>Screening Test Performance Characteristics by Screening Round and Trial Arm</b>                             | 3           |
| Supplemental Table S2a: <b>T1 Lung Cancer Status by Trial Arm, Sex, Age, Race, and Ethnicity</b>                                      | 4           |
| Supplemental Table S2b: <b>T2 Lung Cancer Status by Trial Arm, Sex, Age, Race, and Ethnicity</b>                                      | 5           |
| Supplemental Table S3a: <b>Diagnostic Follow-up of T1 Positive Screens by Study Arm and Lung Cancer Diagnosis</b>                     | 6           |
| Supplemental Table S3b: <b>Diagnostic Follow-up of T2 Positive Screens by Study Arm and Lung Cancer Diagnosis</b>                     | 7           |
| Supplemental Table S4: <b>Maximum Diameter of Largest Nodule Observed on a Positive Screen by Stage of Lung Cancer</b>                | 8           |
| Supplemental Table S5a: <b>First-Line Treatment Procedures at T1 Screen by Screening Arm, Randomization Group and Stage of Cancer</b> | 9           |
| Supplemental Table S5b: <b>First-Line Treatment Procedures at T2 by Screening Arm, Randomization Group and Stage of Cancer</b>        | 10          |
| Supplemental Table S6: <b>Histology of Lung Cancers by Screening Round, Trial Arm, and Screening Result</b>                           | 11          |
| Supplement Material: <b>The National Lung Screening Trial Research Team: Participating Sites and Investigators</b>                    | 12          |

## **Rules Determining the Presence or Absence of Lung Cancer**

Measures of diagnostic and predictive accuracy at T1 and T2 rounds were derived using data only from participants who had adequate screening exams in the respective rounds, and for whom lung cancer status was known. For each dichotomous (positive vs. negative) screening result, lung cancer was classified as present or not present at the time of the screen as follows. Lung cancer was considered to be present at the time of a screen if the lung cancer diagnosis was documented during the interval from the screen to either the next screen or within a one-year period following the screen, whichever came first. For positive screens, lung cancer was considered present at the time of the screen if a lung cancer diagnosis was documented during any period in which the participant had no further screening, but a sequence of diagnostic procedures prompted by the screen with no time gap between consecutive procedures greater than one year.

A screen was classified as having been done in the absence of lung cancer if none of the above criteria were satisfied and at least one of the following was satisfied:

1. The participant had a subsequent screen,
2. The participant received at least one screen-prompted diagnostic procedure (clinical evaluation at a minimum),
3. The participant died, the death was certified by the NLST Endpoint Verification Process and there was no documentation of a diagnosis of lung cancer,
4. The participant responded to a survey at least 300 days after the screen and reported that lung cancer had not been diagnosed, or
5. The participant had a documented diagnosis of lung cancer more than one year after the screen.

Screening results that could not be categorized as above were classified as having an unknown lung cancer status.

**Supplemental Table S1: Screening Test Performance Characteristics by Screening Round and Trial Arm**

| Study Year | Arm  | Performance Characteristic | N / Total   | Estimate (%) | Confidence Interval (%) |
|------------|------|----------------------------|-------------|--------------|-------------------------|
| T1         | LDCT | Sensitivity                | 168/178     | 94.4         | 90.8 to 97.6            |
| T1         | LDCT | Specificity                | 17788/24516 | 72.6         | 72.0 to 73.1            |
| T1         | LDCT | PPV                        | 168/6896    | 2.4          | 2.1 to 2.8              |
| T1         | LDCT | NPV                        | 17788/17798 | 99.9         | 99.9 to 100.0           |
| T1         | CXR  | Sensitivity                | 65/109      | 59.6         | 50.0 to 69.0            |
| T1         | CXR  | Specificity                | 22521/23937 | 94.1         | 93.8 to 94.4            |
| T1         | CXR  | PPV                        | 65/1481     | 4.4          | 3.3 to 5.5              |
| T1         | CXR  | NPV                        | 22521/22565 | 99.8         | 99.7 to 99.9            |
| T2         | LDCT | Sensitivity                | 211/227     | 93.0         | 89.7 to 96.3            |
| T2         | LDCT | Specificity                | 19968/23806 | 83.9         | 83.4 to 84.3            |
| T2         | LDCT | PPV                        | 211/4049    | 5.2          | 4.6 to 5.9              |
| T2         | LDCT | NPV                        | 19968/19984 | 99.9         | 99.9 to 100.0           |
| T2         | CXR  | Sensitivity                | 78/122      | 63.9         | 55.2 to 72.1            |
| T2         | CXR  | Specificity                | 22067/23161 | 95.3         | 95.0 to 95.6            |
| T2         | CXR  | PPV                        | 78/1172     | 6.7          | 5.2 to 8.2              |
| T2         | CXR  | NPV                        | 22067/22111 | 99.8         | 99.7 to 99.9            |

Abbreviations: T1 = T1 screen; T2 = T2 screen; LDCT = low dose computed tomography; CXR = chest x-ray arm; PPV = positive predictive value; NPV = negative predictive value.

Note: 95% confidence intervals were calculated with a resampling method.

Supplemental Table S2a: T1 Lung Cancer Status by Trial Arm, Sex, Age, Race, and Ethnicity

| T1 Screens                                | Study Arm |          |               |             |               |          |          |               |             |               |
|-------------------------------------------|-----------|----------|---------------|-------------|---------------|----------|----------|---------------|-------------|---------------|
|                                           | LDCT      |          |               |             |               | CXR      |          |               |             |               |
|                                           | Eligible  | Screened |               | Lung Cancer |               | Eligible | Screened |               | Lung Cancer |               |
|                                           | N         | N        | % of eligible | N           | % of screened | N        | N        | % of eligible | N           | % of screened |
| All                                       | 26,285    | 24,715   | 94.0          | 178         | 0.7           | 26,410   | 24,089   | 91.2          | 109         | 0.5           |
| Sex                                       |           |          |               |             |               |          |          |               |             |               |
| Male                                      | 15,486    | 14,612   | 94.4          | 106         | 0.7           | 15,558   | 14,314   | 92.0          | 67          | 0.5           |
| Female                                    | 10,799    | 10,103   | 93.6          | 72          | 0.7           | 10,852   | 9775     | 90.1          | 42          | 0.4           |
| Age(years)                                |           |          |               |             |               |          |          |               |             |               |
| ≤ 54 <sup>1</sup>                         | 1         | 1        | 100.0         | 0           | 0.0           | 4        | 3        | 75.0          | 0           | 0.0           |
| 55-59                                     | 11,308    | 10,572   | 93.5          | 39          | 0.4           | 11,339   | 10,295   | 90.8          | 27          | 0.3           |
| 60-64                                     | 8057      | 7611     | 94.5          | 64          | 0.8           | 8108     | 7393     | 91.2          | 39          | 0.5           |
| 65-69                                     | 4653      | 4411     | 94.8          | 48          | 1.1           | 4672     | 4312     | 92.3          | 27          | 0.6           |
| 70-74                                     | 2265      | 2119     | 93.6          | 27          | 1.3           | 2284     | 2084     | 91.2          | 16          | 0.8           |
| ≥ 75 <sup>1</sup>                         | 1         | 1        | 100.0         | 0           | 0.0           | 3        | 2        | 66.7          | 0           | 0.0           |
| Race                                      |           |          |               |             |               |          |          |               |             |               |
| White                                     | 23,895    | 22,620   | 94.7          | 164         | 0.7           | 23,992   | 22,039   | 91.9          | 100         | 0.5           |
| Black or African-American                 | 1176      | 1027     | 87.3          | 10          | 1.0           | 1154     | 991      | 85.9          | 6           | 0.6           |
| Asian                                     | 551       | 514      | 93.3          | 1           | 0.2           | 530      | 492      | 92.8          | 2           | 0.4           |
| American Indian or Alaskan Native         | 90        | 81       | 90.0          | 1           | 1.2           | 96       | 85       | 88.5          | 0           | 0.0           |
| Native Hawaiian or Other Pacific Islander | 87        | 71       | 81.6          | 0           | 0.0           | 101      | 89       | 88.1          | 0           | 0.0           |
| More than one race                        | 329       | 311      | 94.5          | 1           | 0.3           | 340      | 305      | 89.7          | 1           | 0.3           |
| Refused                                   | 57        | 52       | 91.2          | 0           | 0.0           | 52       | 47       | 90.4          | 0           | 0.0           |
| Unknown                                   | 100       | 39       | 39.0          | 1           | 2.6           | 145      | 41       | 28.3          | 0           | 0.0           |
| Ethnicity                                 |           |          |               |             |               |          |          |               |             |               |
| Hispanic or Latino                        | 468       | 436      | 93.2          | 1           | 0.2           | 451      | 407      | 90.2          | 2           | 0.5           |
| Neither Hispanic nor Latino               | 25,662    | 24,186   | 94.2          | 176         | 0.7           | 25,732   | 23,573   | 91.6          | 107         | 0.5           |
| Refused                                   | 5         | 5        | 100.0         | 0           | 0.0           | 1        | 0        | 0.0           | 0           | 0.0           |
| Unknown                                   | 150       | 88       | 58.7          | 1           | 1.1           | 226      | 109      | 48.2          | 0           | 0.0           |

<sup>1</sup> Ineligible but included in analysis

Supplemental Table S2b: T2 Lung Cancer Status by Trial Arm, Sex, Age, Race, and Ethnicity

| T2 Screens                                | Study Arm |          |               |             |               |          |          |               |             |               |
|-------------------------------------------|-----------|----------|---------------|-------------|---------------|----------|----------|---------------|-------------|---------------|
|                                           | LDCT      |          |               |             |               | CXR      |          |               |             |               |
|                                           | Eligible  | Screened |               | Lung Cancer |               | Eligible | Screened |               | Lung Cancer |               |
|                                           | N         | N        | % of eligible | N           | % of screened | N        | N        | % of eligible | N           | % of screened |
| All                                       | 25,942    | 24,102   | 92.9          | 227         | 0.9           | 26,110   | 23,346   | 89.4          | 122         | 0.5           |
| Sex                                       |           |          |               |             |               |          |          |               |             |               |
| Male                                      | 15,261    | 14,223   | 93.2          | 140         | 1.0           | 15,345   | 13,890   | 90.5          | 71          | 0.5           |
| Female                                    | 10,681    | 9879     | 92.5          | 87          | 0.9           | 10,765   | 9456     | 87.8          | 51          | 0.5           |
| Age (Years)                               |           |          |               |             |               |          |          |               |             |               |
| ≤ 54 <sup>1</sup>                         | 1         | 1        | 100.0         | 0           | 0.0           | 4        | 3        | 75.0          | 0           | 0.0           |
| 55-59                                     | 11,221    | 10,376   | 92.5          | 69          | 0.7           | 11,262   | 9969     | 88.5          | 31          | 0.3           |
| 60-64                                     | 7941      | 7421     | 93.5          | 66          | 0.9           | 8012     | 7189     | 89.7          | 35          | 0.5           |
| 65-69                                     | 4571      | 4267     | 93.3          | 61          | 1.4           | 4600     | 4165     | 90.5          | 29          | 0.7           |
| 70-74                                     | 2207      | 2036     | 92.3          | 31          | 1.5           | 2229     | 2017     | 90.5          | 27          | 1.3           |
| ≥ 75 <sup>1</sup>                         | 1         | 1        | 100.0         | 0           | 0.0           | 3        | 3        | 100.0         | 0           | 0.0           |
| Race                                      |           |          |               |             |               |          |          |               |             |               |
| White                                     | 23,580    | 22,077   | 93.6          | 208         | 0.9           | 23,723   | 21,366   | 90.1          | 112         | 0.5           |
| Black or African-American                 | 1156      | 1000     | 86.5          | 12          | 1.2           | 1135     | 956      | 84.2          | 8           | 0.8           |
| Asian                                     | 548       | 497      | 90.7          | 3           | 0.6           | 524      | 475      | 90.6          | 1           | 0.2           |
| American Indian or Alaskan Native         | 89        | 73       | 82.0          | 2           | 2.7           | 95       | 83       | 87.4          | 0           | 0.0           |
| Native Hawaiian or Other Pacific Islander | 85        | 69       | 81.2          | 1           | 1.4           | 101      | 83       | 82.2          | 1           | 1.2           |
| More than one race                        | 328       | 296      | 90.2          | 1           | 0.3           | 337      | 293      | 86.9          | 0           | 0.0           |
| Refused                                   | 57        | 51       | 89.5          | 0           | 0.0           | 52       | 45       | 86.5          | 0           | 0.0           |
| Unknown                                   | 99        | 39       | 39.4          | 0           | 0.0           | 143      | 45       | 31.5          | 0           | 0.0           |
| Hispanic ethnicity                        |           |          |               |             |               |          |          |               |             |               |
| Hispanic or Latino                        | 466       | 423      | 90.8          | 1           | 0.2           | 447      | 396      | 88.6          | 0           | 0.0           |
| Neither Hispanic nor Latino               | 25,323    | 23,588   | 93.1          | 225         | 1.0           | 25,438   | 22,840   | 89.8          | 120         | 0.5           |
| Refused                                   | 5         | 5        | 100.0         | 0           | 0.0           | 1        | 0        | 0.0           | 0           | 0.0           |
| Unknown                                   | 148       | 86       | 58.1          | 1           | 1.2           | 224      | 110      | 49.1          | 2           | 1.8           |

<sup>1</sup> Ineligible but included in analysis

Supplemental Table S3a. Diagnostic Follow-up of T1 Positive Screens by Study Arm and Lung Cancer Diagnosis

| Diagnostic Procedure <sup>1</sup>                                               | Low Dose Computed Tomography Arm   |       |                                       |       |       |       | Chest X-ray Arm                    |       |                                       |       |       |       |
|---------------------------------------------------------------------------------|------------------------------------|-------|---------------------------------------|-------|-------|-------|------------------------------------|-------|---------------------------------------|-------|-------|-------|
|                                                                                 | Confirmed lung cancer <sup>2</sup> |       | No confirmed lung cancer <sup>3</sup> |       | Total |       | Confirmed lung cancer <sup>2</sup> |       | No confirmed lung cancer <sup>3</sup> |       | Total |       |
|                                                                                 | N                                  | %     | N                                     | %     | N     | %     | N                                  | %     | N                                     | %     | N     | %     |
| Any diagnostic follow-up                                                        | 168                                | 100.0 | 3698                                  | 56.3  | 3866  | 57.4  | 65                                 | 100.0 | 1013                                  | 72.8  | 1078  | 74.0  |
| Clinical procedure                                                              | 158                                | 94.0  | 3032                                  | 46.1  | 3190  | 47.3  | 61                                 | 93.8  | 662                                   | 47.6  | 723   | 49.7  |
| Imaging exam                                                                    | 155                                | 92.3  | 2365                                  | 36.0  | 2520  | 37.4  | 64                                 | 98.5  | 904                                   | 65.0  | 968   | 66.5  |
| CXR                                                                             | 51                                 | 30.4  | 562                                   | 8.6   | 613   | 9.1   | 28                                 | 43.1  | 353                                   | 25.4  | 381   | 26.2  |
| Chest CT                                                                        | 111                                | 66.1  | 1935                                  | 29.4  | 2046  | 30.4  | 59                                 | 90.8  | 686                                   | 49.3  | 745   | 51.2  |
| FDG PET or FDG PET/CT                                                           | 112                                | 66.7  | 238                                   | 3.6   | 350   | 5.2   | 51                                 | 78.5  | 54                                    | 3.9   | 105   | 7.2   |
| Percutaneous cytology or biopsy                                                 | 47                                 | 28.0  | 27                                    | 0.4   | 74    | 1.1   | 27                                 | 41.5  | 10                                    | 0.7   | 37    | 2.5   |
| Transthoracic                                                                   | 37                                 | 22.0  | 23                                    | 0.3   | 60    | 0.9   | 21                                 | 32.3  | 10                                    | 0.7   | 31    | 2.1   |
| Extrathoracic                                                                   | 13                                 | 7.7   | 4                                     | 0.1   | 17    | 0.3   | 6                                  | 9.2   | 0                                     | 0.0   | 6     | 0.4   |
| Bronchoscopy                                                                    | 103                                | 61.3  | 75                                    | 1.1   | 178   | 2.6   | 37                                 | 56.9  | 19                                    | 1.4   | 56    | 3.8   |
| Surgical procedure                                                              | 145                                | 86.3  | 52                                    | 0.8   | 197   | 2.9   | 43                                 | 66.2  | 8                                     | 0.6   | 51    | 3.5   |
| Mediastinoscopy/mediastinotomy                                                  | 26                                 | 15.5  | 6                                     | 0.1   | 32    | 0.5   | 10                                 | 15.4  | 2                                     | 0.1   | 12    | 0.8   |
| Thoracoscopy                                                                    | 40                                 | 23.8  | 16                                    | 0.2   | 56    | 0.8   | 6                                  | 9.2   | 5                                     | 0.4   | 11    | 0.8   |
| Thoracotomy                                                                     | 120                                | 71.4  | 28                                    | 0.4   | 148   | 2.2   | 39                                 | 60.0  | 5                                     | 0.4   | 44    | 3.0   |
| Other procedures                                                                | 18                                 | 10.7  | 78                                    | 1.2   | 96    | 1.4   | 17                                 | 26.2  | 16                                    | 1.2   | 33    | 2.3   |
| Total participants with positive screens with documented follow-up <sup>4</sup> | 168                                | 100.0 | 6572                                  | 100.0 | 6740  | 100.0 | 65                                 | 100.0 | 1391                                  | 100.0 | 1456  | 100.0 |

<sup>1</sup> Numbers refer to the number of participants who received any procedure included in the diagnostic procedure category at least once.

<sup>2</sup> Confirmed lung cancers do not include the following participants diagnosed with lung cancer during the T1 study year: 32 participants not screened at T1, 10 with negative LDCT screens at T1 and 44 with negative CXR screens at T1.

<sup>3</sup> 'No Confirmed Lung Cancer' includes participants with a negative or unknown lung cancer status.

<sup>4</sup> This table excludes positive screenees for whom information on diagnostic follow-up procedures was incomplete (161 LDCT and 26 CXR).

**Supplemental Table S3b. Diagnostic Follow-up of T2 Positive Screens by Study Arm and Lung Cancer Diagnosis**

| Diagnostic Procedure <sup>1</sup>                                               | Low Dose Computed Tomography Arm   |       |                                       |       |       |       | Chest X-ray Arm                    |       |                                       |       |       |       |
|---------------------------------------------------------------------------------|------------------------------------|-------|---------------------------------------|-------|-------|-------|------------------------------------|-------|---------------------------------------|-------|-------|-------|
|                                                                                 | Confirmed lung cancer <sup>2</sup> |       | No confirmed lung cancer <sup>3</sup> |       | Total |       | Confirmed lung cancer <sup>2</sup> |       | No confirmed lung cancer <sup>3</sup> |       | Total |       |
|                                                                                 | N                                  | %     | N                                     | %     | N     | %     | N                                  | %     | N                                     | %     | N     | %     |
| Any diagnostic follow-up                                                        | 211                                | 100.0 | 2311                                  | 62.4  | 2522  | 64.5  | 78                                 | 100.0 | 879                                   | 82.1  | 957   | 83.3  |
| Clinical procedure                                                              | 198                                | 93.8  | 1953                                  | 52.8  | 2151  | 55.0  | 70                                 | 89.7  | 588                                   | 54.9  | 658   | 57.3  |
| Imaging exam                                                                    | 201                                | 95.3  | 1808                                  | 48.8  | 2009  | 51.3  | 75                                 | 96.2  | 831                                   | 77.6  | 906   | 78.9  |
| CXR                                                                             | 80                                 | 37.9  | 570                                   | 15.4  | 650   | 16.6  | 24                                 | 30.8  | 341                                   | 31.8  | 365   | 31.8  |
| Chest CT                                                                        | 147                                | 69.7  | 1461                                  | 39.5  | 1608  | 41.1  | 72                                 | 92.3  | 640                                   | 59.8  | 712   | 62.0  |
| FDG PET or FDG PET/CT                                                           | 156                                | 73.9  | 237                                   | 6.4   | 393   | 10.0  | 63                                 | 80.8  | 50                                    | 4.7   | 113   | 9.8   |
| Percutaneous cytology or biopsy                                                 | 69                                 | 32.7  | 24                                    | 0.6   | 93    | 2.4   | 38                                 | 48.7  | 14                                    | 1.3   | 52    | 4.5   |
| Transthoracic                                                                   | 54                                 | 25.6  | 20                                    | 0.5   | 74    | 1.9   | 31                                 | 39.7  | 12                                    | 1.1   | 43    | 3.7   |
| Extrathoracic                                                                   | 20                                 | 9.5   | 4                                     | 0.1   | 24    | 0.6   | 9                                  | 11.5  | 4                                     | 0.4   | 13    | 1.1   |
| Bronchoscopy                                                                    | 113                                | 53.6  | 74                                    | 2.0   | 187   | 4.8   | 44                                 | 56.4  | 18                                    | 1.7   | 62    | 5.4   |
| Surgical procedure                                                              | 175                                | 82.9  | 44                                    | 1.2   | 219   | 5.6   | 52                                 | 66.7  | 15                                    | 1.4   | 67    | 5.8   |
| Mediastinoscopy/mediastinotomy                                                  | 22                                 | 10.4  | 3                                     | 0.1   | 25    | 0.6   | 16                                 | 20.5  | 5                                     | 0.5   | 21    | 1.8   |
| Thoracoscopy                                                                    | 74                                 | 35.1  | 22                                    | 0.6   | 96    | 2.5   | 14                                 | 17.9  | 6                                     | 0.6   | 20    | 1.7   |
| Thoracotomy                                                                     | 138                                | 65.4  | 26                                    | 0.7   | 164   | 4.2   | 38                                 | 48.7  | 6                                     | 0.6   | 44    | 3.8   |
| Other procedures                                                                | 29                                 | 13.7  | 34                                    | 0.9   | 63    | 1.6   | 13                                 | 16.7  | 21                                    | 2.0   | 34    | 3.0   |
| Total participants with positive screens with documented follow-up <sup>4</sup> | 211                                | 100.0 | 3702                                  | 100.0 | 3913  | 100.0 | 78                                 | 100.0 | 1071                                  | 100.0 | 1149  | 100.0 |

<sup>1</sup> Numbers refer to the number of participants who received any procedure included in the diagnostic procedure category at least once.

<sup>2</sup> Confirmed lung cancers do not include the following participants who were diagnosed with lung cancer during the T2 study year: 32 participants who were not screened at T2, 16 with negative LDCT screens at T2, and 44 with negative CXR screens at T2.

<sup>3</sup> 'No Confirmed Lung Cancer' includes participants with a negative or unknown lung cancer status.

<sup>4</sup> This table excludes positive screenees for whom information on diagnostic follow-up procedures was incomplete (141 LDCT and 25 CXR).



Supplemental Table S4: Maximum Diameter of Largest Nodule Observed on a Positive Screen by Stage of Non-Small Cell Lung Cancer<sup>1</sup>

| Maximum diameter of largest nodule on screening exam |                          | LDCT            |       |    |       |     |       |     |       |      |       |      |       |    |       | CXR             |       |    |       |     |       |     |       |      |       |      |       |    |       |
|------------------------------------------------------|--------------------------|-----------------|-------|----|-------|-----|-------|-----|-------|------|-------|------|-------|----|-------|-----------------|-------|----|-------|-----|-------|-----|-------|------|-------|------|-------|----|-------|
|                                                      |                          | Stage of cancer |       |    |       |     |       |     |       |      |       |      |       |    |       | Stage of cancer |       |    |       |     |       |     |       |      |       |      |       |    |       |
|                                                      |                          | IA              |       | IB |       | IIA |       | IIB |       | IIIA |       | IIIB |       | IV |       | IA              |       | IB |       | IIA |       | IIB |       | IIIA |       | IIIB |       | IV |       |
|                                                      |                          | N               | %     | N  | %     | N   | %     | N   | %     | N    | %     | N    | %     | N  | %     | N               | %     | N  | %     | N   | %     | N   | %     | N    | %     | N    | %     | N  | %     |
| Positive screen at T1 round                          | < 4 mm                   | 0               | 0.0   | 0  | 0.0   | 0   | 0.0   | 0   | 0.0   | 0    | 0.0   | 0    | 0.0   | 0  | 0.0   | 0               | 0.0   | 0  | 0.0   | 0   | 0.0   | 0   | 0.0   | 0    | 0.0   | 0    | 0.0   | 1  | 6.3   |
|                                                      | 4-10 mm                  | 32              | 37.2  | 6  | 33.3  | 3   | 30.0  | 4   | 66.7  | 5    | 45.5  | 0    | 0.0   | 3  | 23.1  | 3               | 15.0  | 1  | 11.1  | 0   | 0.0   | 1   | 50.0  | 0    | 0.0   | 0    | 0.0   | 4  | 25.0  |
|                                                      | 11-20 mm                 | 43              | 50.0  | 7  | 38.9  | 5   | 50.0  | 1   | 16.7  | 3    | 27.3  | 3    | 37.5  | 4  | 30.8  | 11              | 55.0  | 1  | 11.1  | 2   | 50.0  | 0   | 0.0   | 1    | 16.7  | 0    | 0.0   | 4  | 25.0  |
|                                                      | 21-30 mm                 | 6               | 7.0   | 5  | 27.8  | 1   | 10.0  | 0   | 0.0   | 1    | 9.1   | 3    | 37.5  | 4  | 30.8  | 5               | 25.0  | 1  | 11.1  | 1   | 25.0  | 1   | 50.0  | 3    | 50.0  | 1    | 100.0 | 2  | 12.5  |
|                                                      | > 30 mm                  | 3               | 3.5   | 0  | 0.0   | 0   | 0.0   | 0   | 0.0   | 1    | 9.1   | 2    | 25.0  | 2  | 15.4  | 0               | 0.0   | 4  | 44.4  | 0   | 0.0   | 0   | 0.0   | 2    | 33.3  | 0    | 0.0   | 3  | 18.8  |
|                                                      | Largest Diameter Unknown | 1               | 1.2   | 0  | 0.0   | 0   | 0.0   | 0   | 0.0   | 0    | 0.0   | 0    | 0.0   | 0  | 0.0   | 0               | 0.0   | 2  | 22.2  | 0   | 0.0   | 0   | 0.0   | 0    | 0.0   | 0    | 0.0   | 0  | 0.0   |
|                                                      | No Nodule Observed       | 1               | 1.2   | 0  | 0.0   | 1   | 10.0  | 1   | 16.7  | 1    | 9.1   | 0    | 0.0   | 0  | 0.0   | 1               | 5.0   | 0  | 0.0   | 1   | 25.0  | 0   | 0.0   | 0    | 0.0   | 0    | 0.0   | 2  | 12.5  |
|                                                      | Total                    | 86              | 100.0 | 18 | 100.0 | 10  | 100.0 | 6   | 100.0 | 11   | 100.0 | 8    | 100.0 | 13 | 100.0 | 20              | 100.0 | 9  | 100.0 | 4   | 100.0 | 2   | 100.0 | 6    | 100.0 | 1    | 100.0 | 16 | 100.0 |
| Positive screen at T2 round                          | < 4 mm                   | 0               | 0.0   | 0  | 0.0   | 0   | 0.0   | 0   | 0.0   | 0    | 0.0   | 0    | 0.0   | 0  | 0.0   | 0               | 0.0   | 1  | 10.0  | 0   | 0.0   | 0   | 0.0   | 0    | 0.0   | 1    | 11.1  | 0  | 0.0   |
|                                                      | 4-10 mm                  | 42              | 38.2  | 7  | 25.0  | 4   | 66.7  | 1   | 50.0  | 5    | 38.5  | 2    | 15.4  | 4  | 28.6  | 6               | 23.1  | 0  | 0.0   | 1   | 16.7  | 0   | 0.0   | 1    | 11.1  | 0    | 0.0   | 5  | 45.5  |
|                                                      | 11-20 mm                 | 49              | 44.5  | 10 | 35.7  | 2   | 33.3  | 1   | 50.0  | 5    | 38.5  | 5    | 38.5  | 4  | 28.6  | 11              | 42.3  | 2  | 20.0  | 0   | 0.0   | 0   | 0.0   | 2    | 22.2  | 1    | 11.1  | 2  | 18.2  |
|                                                      | 21-30 mm                 | 12              | 10.9  | 4  | 14.3  | 0   | 0.0   | 0   | 0.0   | 1    | 7.7   | 1    | 7.7   | 2  | 14.3  | 7               | 26.9  | 2  | 20.0  | 4   | 66.7  | 0   | 0.0   | 3    | 33.3  | 1    | 11.1  | 2  | 18.2  |
|                                                      | > 30 mm                  | 4               | 3.6   | 6  | 21.4  | 0   | 0.0   | 0   | 0.0   | 1    | 7.7   | 3    | 23.1  | 4  | 28.6  | 0               | 0.0   | 0  | 0.0   | 0   | 0.0   | 0   | 0.0   | 1    | 11.1  | 1    | 11.1  | 0  | 0.0   |
|                                                      | Largest Diameter Unknown | 0               | 0.0   | 1  | 3.6   | 0   | 0.0   | 0   | 0.0   | 0    | 0.0   | 0    | 0.0   | 0  | 0.0   | 2               | 7.7   | 3  | 30.0  | 1   | 16.7  | 0   | 0.0   | 1    | 11.1  | 0    | 0.0   | 0  | 0.0   |
|                                                      | No Nodule Observed       | 3               | 2.7   | 0  | 0.0   | 0   | 0.0   | 0   | 0.0   | 1    | 7.7   | 2    | 15.4  | 0  | 0.0   | 0               | 0.0   | 2  | 20.0  | 0   | 0.0   | 0   | 0.0   | 1    | 11.1  | 5    | 55.6  | 2  | 18.2  |
|                                                      | Total                    | 110             | 100.0 | 28 | 100.0 | 6   | 100.0 | 2   | 100.0 | 13   | 100.0 | 13   | 100.0 | 14 | 100.0 | 26              | 100.0 | 10 | 100.0 | 6   | 100.0 | 0   | 0.0   | 9    | 100.0 | 9    | 100.0 | 11 | 100.0 |

<sup>1</sup> Table excludes all small cell lung cancers.

**Supplemental Table S5a: First-Line Treatment Procedures by Screening Arm, Randomization Group and Stage of Cancer**

| First-line Treatment of T1 Lung Cancers <sup>1</sup> |                                         | Stage        |           |              |           |              |          |              |           |              |           |              |           |              |          |              |            | Total        |      |
|------------------------------------------------------|-----------------------------------------|--------------|-----------|--------------|-----------|--------------|----------|--------------|-----------|--------------|-----------|--------------|-----------|--------------|----------|--------------|------------|--------------|------|
|                                                      |                                         | IA           |           | IB           |           | IIA          |          | IIB          |           | IIIA         |           | IIIB         |           | IV           |          | Unknown      |            |              |      |
|                                                      |                                         | N            | %         | N            | %         | N            | %        | N            | %         | N            | %         | N            | %         | N            | %        | N            | %          | N            | %    |
| LDCT                                                 | Surgery only                            | 74           | 85.1      | 13           | 61.9      | 4            | 36.4     | 0            | 0.0       | 3            | 21.4      | 1            | 5.3       | 2            | 8.3      | 1            | 33.3       | 98           | 52.7 |
|                                                      | Surgery and Chemotherapy                | 7            | 8.0       | 8            | 38.1      | 4            | 36.4     | 5            | 71.4      | 2            | 14.3      | 4            | 21.1      | 1            | 4.2      | 0            | 0.0        | 31           | 16.7 |
|                                                      | Surgery and Radiotherapy                | 1            | 1.1       | 0            | 0.0       | 0            | 0.0      | 0            | 0.0       | 0            | 0.0       | 0            | 0.0       | 1            | 4.2      | 0            | 0.0        | 2            | 1.1  |
|                                                      | Surgery, Chemotherapy, and Radiotherapy | 2            | 2.3       | 0            | 0.0       | 3            | 27.3     | 1            | 14.3      | 2            | 14.3      | 1            | 5.3       | 1            | 4.2      | 0            | 0.0        | 10           | 5.4  |
|                                                      | Chemotherapy only                       | 0            | 0.0       | 0            | 0.0       | 0            | 0.0      | 0            | 0.0       | 0            | 0.0       | 3            | 15.8      | 8            | 33.3     | 0            | 0.0        | 11           | 5.9  |
|                                                      | Chemotherapy and Radiotherapy           | 0            | 0.0       | 0            | 0.0       | 0            | 0.0      | 1            | 14.3      | 5            | 35.7      | 9            | 47.4      | 7            | 29.2     | 2            | 66.7       | 24           | 12.9 |
|                                                      | Radiotherapy only                       | 2            | 2.3       | 0            | 0.0       | 0            | 0.0      | 0            | 0.0       | 0            | 0.0       | 0            | 0.0       | 2            | 8.3      | 0            | 0.0        | 4            | 2.2  |
|                                                      | Other Treatment                         | 1            | 1.1       | 0            | 0.0       | 0            | 0.0      | 0            | 0.0       | 0            | 0.0       | 0            | 0.0       | 0            | 0.0      | 0            | 0.0        | 1            | 0.5  |
|                                                      | No Treatment <sup>2</sup>               | 0            | 0.0       | 0            | 0.0       | 0            | 0.0      | 0            | 0.0       | 2            | 14.3      | 0            | 0.0       | 2            | 8.3      | 0            | 0.0        | 4            | 2.2  |
|                                                      | Treatment data incomplete               | 0            | 0.0       | 0            | 0.0       | 0            | 0.0      | 0            | 0.0       | 0            | 0.0       | 1            | 5.3       | 0            | 0.0      | 0            | 0.0        | 1            | 0.5  |
| <b>Total</b>                                         | <b>87</b>                               | <b>100.0</b> | <b>21</b> | <b>100.0</b> | <b>11</b> | <b>100.0</b> | <b>7</b> | <b>100.0</b> | <b>14</b> | <b>100.0</b> | <b>19</b> | <b>100.0</b> | <b>24</b> | <b>100.0</b> | <b>3</b> | <b>100.0</b> | <b>186</b> | <b>100.0</b> |      |
| CXR                                                  | Surgery only                            | 25           | 80.6      | 7            | 63.6      | 2            | 28.6     | 0            | 0.0       | 0            | 0.0       | 0            | 0.0       | 3            | 5.8      | 0            | 0.0        | 37           | 27.8 |
|                                                      | Surgery and Chemotherapy                | 5            | 16.1      | 4            | 36.4      | 2            | 28.6     | 2            | 40.0      | 1            | 7.1       | 1            | 8.3       | 1            | 1.9      | 0            | 0.0        | 16           | 12.0 |
|                                                      | Surgery and Radiotherapy                | 0            | 0.0       | 0            | 0.0       | 1            | 14.3     | 0            | 0.0       | 0            | 0.0       | 0            | 0.0       | 0            | 0.0      | 0            | 0.0        | 1            | 0.8  |
|                                                      | Surgery, Chemotherapy, and Radiotherapy | 0            | 0.0       | 0            | 0.0       | 1            | 14.3     | 1            | 20.0      | 4            | 28.6      | 1            | 8.3       | 1            | 1.9      | 0            | 0.0        | 8            | 6.0  |
|                                                      | Chemotherapy only                       | 0            | 0.0       | 0            | 0.0       | 0            | 0.0      | 0            | 0.0       | 0            | 0.0       | 2            | 16.7      | 25           | 48.1     | 1            | 100.0      | 28           | 21.1 |
|                                                      | Chemotherapy and Radiotherapy           | 1            | 3.2       | 0            | 0.0       | 1            | 14.3     | 2            | 40.0      | 8            | 57.1      | 7            | 58.3      | 8            | 15.4     | 0            | 0.0        | 27           | 20.3 |
|                                                      | Radiotherapy only                       | 0            | 0.0       | 0            | 0.0       | 0            | 0.0      | 0            | 0.0       | 0            | 0.0       | 0            | 0.0       | 9            | 17.3     | 0            | 0.0        | 9            | 6.8  |
|                                                      | Other Treatment                         | 0            | 0.0       | 0            | 0.0       | 0            | 0.0      | 0            | 0.0       | 0            | 0.0       | 0            | 0.0       | 1            | 1.9      | 0            | 0.0        | 1            | 0.8  |
|                                                      | No Treatment <sup>2</sup>               | 0            | 0.0       | 0            | 0.0       | 0            | 0.0      | 0            | 0.0       | 1            | 7.1       | 1            | 8.3       | 4            | 7.7      | 0            | 0.0        | 6            | 4.5  |
|                                                      | Treatment data incomplete               | 0            | 0.0       | 0            | 0.0       | 0            | 0.0      | 0            | 0.0       | 0            | 0.0       | 0            | 0.0       | 0            | 0.0      | 0            | 0.0        | 0            | 0.0  |
| <b>Total</b>                                         | <b>31</b>                               | <b>100.0</b> | <b>11</b> | <b>100.0</b> | <b>7</b>  | <b>100.0</b> | <b>5</b> | <b>100.0</b> | <b>14</b> | <b>100.0</b> | <b>12</b> | <b>100.0</b> | <b>52</b> | <b>100.0</b> | <b>1</b> | <b>100.0</b> | <b>133</b> | <b>100.0</b> |      |

<sup>1</sup> Table includes first-line treatment that occurred within six months of diagnosis.

<sup>2</sup> 'No treatment' includes participants who received no treatment at all or who received first-line treatment greater than 6 months following diagnosis.

**Supplemental Table S5b: First-Line Treatment Procedures by Screening Arm, Randomization Group and Stage of Cancer**

| First-line Treatment of T2 Lung Cancers <sup>1</sup> |                                         | Stage        |           |              |          |              |          |              |           |              |           |              |           |              |          |              |            | Total        |      |
|------------------------------------------------------|-----------------------------------------|--------------|-----------|--------------|----------|--------------|----------|--------------|-----------|--------------|-----------|--------------|-----------|--------------|----------|--------------|------------|--------------|------|
|                                                      |                                         | IA           |           | IB           |          | IIA          |          | IIB          |           | IIIA         |           | IIIB         |           | IV           |          | Unknown      |            |              |      |
|                                                      |                                         | N            | %         | N            | %        | N            | %        | N            | %         | N            | %         | N            | %         | N            | %        | N            | %          | N            | %    |
| LDCT                                                 | Surgery only                            | 103          | 88.8      | 13           | 41.9     | 0            | 0.0      | 2            | 40.0      | 2            | 13.3      | 5            | 25.0      | 2            | 5.7      | 3            | 42.9       | 130          | 54.9 |
|                                                      | Surgery and Chemotherapy                | 4            | 3.4       | 15           | 48.4     | 6            | 75.0     | 1            | 20.0      | 3            | 20.0      | 3            | 15.0      | 2            | 5.7      | 0            | 0.0        | 34           | 14.3 |
|                                                      | Surgery and Radiotherapy                | 1            | 0.9       | 0            | 0.0      | 0            | 0.0      | 0            | 0.0       | 0            | 0.0       | 0            | 0.0       | 0            | 0.0      | 0            | 0.0        | 1            | 0.4  |
|                                                      | Surgery, Chemotherapy, and Radiotherapy | 2            | 1.7       | 0            | 0.0      | 0            | 0.0      | 1            | 20.0      | 4            | 26.7      | 2            | 10.0      | 1            | 2.9      | 0            | 0.0        | 10           | 4.2  |
|                                                      | Chemotherapy only                       | 0            | 0.0       | 1            | 3.2      | 0            | 0.0      | 0            | 0.0       | 1            | 6.7       | 4            | 20.0      | 14           | 40.0     | 0            | 0.0        | 20           | 8.4  |
|                                                      | Chemotherapy and Radiotherapy           | 1            | 0.9       | 0            | 0.0      | 2            | 25.0     | 0            | 0.0       | 5            | 33.3      | 4            | 20.0      | 3            | 8.6      | 1            | 14.3       | 16           | 6.8  |
|                                                      | Radiotherapy only                       | 1            | 0.9       | 1            | 3.2      | 0            | 0.0      | 0            | 0.0       | 0            | 0.0       | 0            | 0.0       | 1            | 2.9      | 0            | 0.0        | 3            | 1.3  |
|                                                      | Other Treatment                         | 2            | 1.7       | 0            | 0.0      | 0            | 0.0      | 0            | 0.0       | 0            | 0.0       | 0            | 0.0       | 1            | 2.9      | 1            | 14.3       | 4            | 1.7  |
|                                                      | No Treatment <sup>2</sup>               | 2            | 1.7       | 1            | 3.2      | 0            | 0.0      | 0            | 0.0       | 0            | 0.0       | 2            | 10.0      | 9            | 25.7     | 2            | 28.6       | 16           | 6.8  |
|                                                      | Treatment data incomplete               | 0            | 0.0       | 0            | 0.0      | 0            | 0.0      | 1            | 20.0      | 0            | 0.0       | 0            | 0.0       | 2            | 5.7      | 0            | 0.0        | 3            | 1.3  |
| <b>Total</b>                                         | <b>116</b>                              | <b>100.0</b> | <b>31</b> | <b>100.0</b> | <b>8</b> | <b>100.0</b> | <b>5</b> | <b>100.0</b> | <b>15</b> | <b>100.0</b> | <b>20</b> | <b>100.0</b> | <b>35</b> | <b>100.0</b> | <b>7</b> | <b>100.0</b> | <b>237</b> | <b>100.0</b> |      |
| CXR                                                  | Surgery only                            | 24           | 68.6      | 4            | 30.8     | 2            | 22.2     | 0            | 0.0       | 1            | 5.6       | 1            | 4.8       | 4            | 9.1      | 0            | 0.0        | 36           | 25.0 |
|                                                      | Surgery and Chemotherapy                | 2            | 5.7       | 5            | 38.5     | 3            | 33.3     | 0            | 0.0       | 4            | 22.2      | 2            | 9.5       | 1            | 2.3      | 0            | 0.0        | 17           | 11.8 |
|                                                      | Surgery and Radiotherapy                | 1            | 2.9       | 0            | 0.0      | 2            | 22.2     | 1            | 33.3      | 0            | 0.0       | 0            | 0.0       | 0            | 0.0      | 0            | 0.0        | 4            | 2.8  |
|                                                      | Surgery, Chemotherapy, and Radiotherapy | 1            | 2.9       | 1            | 7.7      | 0            | 0.0      | 0            | 0.0       | 0            | 0.0       | 2            | 9.5       | 2            | 4.5      | 0            | 0.0        | 6            | 4.2  |
|                                                      | Chemotherapy only                       | 0            | 0.0       | 0            | 0.0      | 0            | 0.0      | 0            | 0.0       | 0            | 0.0       | 2            | 9.5       | 15           | 34.1     | 0            | 0.0        | 17           | 11.8 |
|                                                      | Chemotherapy and Radiotherapy           | 0            | 0.0       | 2            | 15.4     | 2            | 22.2     | 1            | 33.3      | 12           | 66.7      | 12           | 57.1      | 12           | 27.3     | 0            | 0.0        | 41           | 28.5 |
|                                                      | Radiotherapy only                       | 4            | 11.4      | 0            | 0.0      | 0            | 0.0      | 0            | 0.0       | 1            | 5.6       | 0            | 0.0       | 4            | 9.1      | 1            | 100.0      | 10           | 6.9  |
|                                                      | Other Treatment                         | 0            | 0.0       | 0            | 0.0      | 0            | 0.0      | 0            | 0.0       | 0            | 0.0       | 1            | 4.8       | 1            | 2.3      | 0            | 0.0        | 2            | 1.4  |
|                                                      | No Treatment <sup>2</sup>               | 3            | 8.6       | 1            | 7.7      | 0            | 0.0      | 1            | 33.3      | 0            | 0.0       | 1            | 4.8       | 5            | 11.4     | 0            | 0.0        | 11           | 7.6  |
|                                                      | Treatment data incomplete               | 0            | 0.0       | 0            | 0.0      | 0            | 0.0      | 0            | 0.0       | 0            | 0.0       | 0            | 0.0       | 0            | 0.0      | 0            | 0.0        | 0            | 0.0  |
| <b>Total</b>                                         | <b>35</b>                               | <b>100.0</b> | <b>13</b> | <b>100.0</b> | <b>9</b> | <b>100.0</b> | <b>3</b> | <b>100.0</b> | <b>18</b> | <b>100.0</b> | <b>21</b> | <b>100.0</b> | <b>44</b> | <b>100.0</b> | <b>1</b> | <b>100.0</b> | <b>144</b> | <b>100.0</b> |      |

<sup>1</sup> Table includes first-line treatment that occurred within six months of diagnosis.

<sup>2</sup> 'No treatment' includes participants who received no treatment at all or who received first-line treatment greater than 6 months following diagnosis.

**Supplemental Table S6: Histology of Lung Cancers by Screening Round, Trial Arm and Screening Result**

| T1 screening round <sup>1</sup>        | LDCT Screen Result |              |           |              |           |              |            |              | CXR Screen Result |              |           |              |           |              |            |              |
|----------------------------------------|--------------------|--------------|-----------|--------------|-----------|--------------|------------|--------------|-------------------|--------------|-----------|--------------|-----------|--------------|------------|--------------|
|                                        | Positive           |              | Negative  |              | No screen |              | Total      |              | Positive          |              | Negative  |              | No screen |              | Total      |              |
|                                        | N                  | %            | N         | %            | N         | %            | N          | %            | N                 | %            | N         | %            | N         | %            | N          | %            |
| BAC                                    | 29                 | 17.3         | 0         | 0.0          | 1         | 12.5         | 30         | 16.1         | 0                 | 0.0          | 0         | 0.0          | 3         | 12.5         | 3          | 2.3          |
| Adenocarcinoma                         | 64                 | 38.1         | 2         | 20.0         | 2         | 25.0         | 68         | 36.6         | 26                | 40.6         | 14        | 32.6         | 3         | 12.5         | 43         | 32.8         |
| Squamous cell                          | 34                 | 20.2         | 3         | 30.0         | 2         | 25.0         | 39         | 21.0         | 19                | 29.7         | 7         | 16.3         | 4         | 16.7         | 30         | 22.9         |
| Large cell                             | 9                  | 5.4          | 0         | 0.0          | 1         | 12.5         | 10         | 5.4          | 3                 | 4.7          | 2         | 4.7          | 3         | 12.5         | 8          | 6.1          |
| NSCLC, other or NOS <sup>2</sup>       | 17                 | 10.1         | 1         | 10.0         | 0         | 0.0          | 18         | 9.7          | 8                 | 12.5         | 10        | 23.3         | 8         | 33.3         | 26         | 19.8         |
| Small cell                             | 15                 | 8.9          | 4         | 40.0         | 2         | 25.0         | 21         | 11.3         | 7                 | 10.9         | 10        | 23.3         | 3         | 12.5         | 20         | 15.3         |
| Carcinoid                              | 0                  | 0.0          | 0         | 0.0          | 0         | 0.0          | 0          | 0.0          | 1                 | 1.6          | 0         | 0.0          | 0         | 0.0          | 1          | 0.8          |
| Unknown                                | 0                  | -            | 0         | -            | 0         | -            | 0          | -            | 1                 | -            | 1         | -            | 0         | -            | 2          | -            |
| <b>Total</b>                           | <b>168</b>         | <b>100.0</b> | <b>10</b> | <b>100.0</b> | <b>8</b>  | <b>100.0</b> | <b>186</b> | <b>100.0</b> | <b>65</b>         | <b>100.0</b> | <b>44</b> | <b>100.0</b> | <b>24</b> | <b>100.0</b> | <b>133</b> | <b>100.0</b> |
| <b>T2 screening round <sup>1</sup></b> |                    |              |           |              |           |              |            |              |                   |              |           |              |           |              |            |              |
| BAC                                    | 28                 | 13.3         | 1         | 6.3          | 0         | 0.0          | 29         | 12.3         | 5                 | 6.6          | 1         | 2.3          | 1         | 4.5          | 7          | 4.9          |
| Adenocarcinoma                         | 76                 | 36.2         | 2         | 12.5         | 4         | 44.4         | 82         | 34.9         | 33                | 43.4         | 8         | 18.2         | 6         | 27.3         | 47         | 33.1         |
| Squamous cell                          | 55                 | 26.2         | 4         | 25.0         | 2         | 22.2         | 61         | 26.0         | 19                | 25.0         | 10        | 22.7         | 5         | 22.7         | 34         | 23.9         |
| Large cell                             | 5                  | 2.4          | 0         | 0.0          | 0         | 0.0          | 5          | 2.1          | 1                 | 1.3          | 3         | 6.8          | 0         | 0.0          | 4          | 2.8          |
| NSCLC, other or NOS <sup>3</sup>       | 24                 | 11.4         | 2         | 12.5         | 2         | 22.2         | 28         | 11.9         | 12                | 15.8         | 11        | 25.0         | 2         | 9.1          | 25         | 17.6         |
| Small cell                             | 19                 | 9.0          | 7         | 43.8         | 1         | 11.1         | 27         | 11.5         | 6                 | 7.9          | 11        | 25.0         | 8         | 36.4         | 25         | 17.6         |
| Carcinoid                              | 3                  | 1.4          | 0         | 0.0          | 0         | 0.0          | 3          | 1.3          | 0                 | 0.0          | 0         | 0.0          | 0         | 0.0          | 0          | 0.0          |
| Unknown                                | 1                  | -            | 0         | -            | 1         | -            | 2          | -            | 2                 | -            | 0         | -            | 0         | -            | 2          | -            |
| <b>Total</b>                           | <b>211</b>         | <b>100.0</b> | <b>16</b> | <b>100.0</b> | <b>10</b> | <b>100.0</b> | <b>237</b> | <b>100.0</b> | <b>78</b>         | <b>100.0</b> | <b>44</b> | <b>100.0</b> | <b>22</b> | <b>100.0</b> | <b>144</b> | <b>100.0</b> |

Abbreviations: LDCT = low dose computed tomography, CXR = chest x-ray, NSCLC = non-small cell lung cancer, NOS = not otherwise specified.

<sup>1</sup> Percentages are calculated using a denominator that equals the number of cancers of known histology.

<sup>2</sup> At the T1 Screening Round, 'NSCLC, other or NOS' includes: 6 adenosquamous carcinomas, 7 unclassified carcinomas, and 31 coded only as 'non-small cell carcinoma'.

<sup>3</sup> 'NSCLC, other or NOS' includes: 7 adenosquamous carcinomas, 1 sarcomatoid carcinoma, 8 unclassified carcinomas, and 37 coded only as 'non-small cell carcinoma'.

## **THE NATIONAL LUNG SCREENING TRIAL RESEARCH TEAM**

### **Results of the Two Incidence Screening in the National Lung Screening Trial**

Denise R. Aberle, MD; Christine D. Berg, MD; William C. Black, MD; Brenda Brewer MMSc; Timothy R. Church, PhD; Kathy L. Clingan, BA; Sarah DeMello, MS; Fenghai Duan, PhD; Richard M. Fagerstrom, PhD; Ilana F. Gareen, PhD; Constantine A. Gatsonis, PhD; David S. Gierada, MD; Amanda Jain, MPH; Gordon C. Jones, MS; Irene Mahon, RN, MPH; Pamela M. Marcus, PhD; Joshua M. Rathmell, MS; JoRean Sicks, MD, for the National Lung Screening Trial Research Team.

#### **I. NLST EXECUTIVE COMMITTEE**

|                                |                             |                           |
|--------------------------------|-----------------------------|---------------------------|
| Denise R. Aberle, MD           | Jonathan G. Goldin, MD, PhD | Mitchell Schnall, MD, PhD |
| Christine D. Berg, MD          | John K. Gohagan, PhD*       | Daniel C. Sullivan, MD*   |
| William C. Black, MD           | Bruce Hillman, MD*          | Dorothy Sullivan          |
| Timothy R. Church, PhD, MS     | Paula M. Jacobs, PhD        | James L. Tatum, MD*       |
| Richard M. Fagerstrom, PhD     | Carl Jaffe, MD*             | Carl J. Zylak, MD         |
| Barbara Galen, MSN, CRNP, CNMT | Barnett S. Kramer, MD, MPH  |                           |
| Ilana F. Gareen, PhD           | David Lynch, MD             |                           |
| Constantine Gatsonis, PhD      | Pamela M. Marcus, PhD       |                           |

\*Former members: JKG, Former Project Officer; BH, Former Co-Chair of Executive Committee; CJ and DCS, Former Directors, Cancer Imaging Program, Division of Cancer Treatment and Diagnosis, National Cancer Institute; JLT, Former Associate Director, Cancer Imaging Program, Division of Cancer Treatment and Diagnosis, National Cancer Institute.

#### **II MAJOR CONTRIBUTING INVESTIGATORS**

##### NLST-ACRIN Principal Investigator

Denise R. Aberle, MD

##### Chief Statisticians

Richard M. Fagerstrom, PhD;  
Constantine Gatsonis, PhD.

##### Lead Epidemiologists

Ilana F. Gareen, PhD;  
Pamela M. Marcus, PhD.

##### NLST-LSS Project Officer

Christine D. Berg, MD

##### Lead Medical Physicists

Christopher Cagnon, PhD; Dianna Cody, PhD; Glenn Fletcher, PhD; Michael J. Flynn, PhD; Philip F. Judy, PhD; Randell Kruger, PhD; Frederick J. Larke, MS, DABR; Michael McNitt-Gray, PhD; Thomas Payne, PhD; J. Anthony Seibert, PhD; Xizeng Wu, PhD.

##### Lead Site Investigators: ACRIN

Gerald Abbott, MD; Denise R. Aberle, MD; Judith K. Amorosa, MD; Richard G. Barr, MD, PhD; William C. Black, MD; Phillip M. Boiselle, MD; Caroline Chiles, MD; Robert Clark, MD; Lynn Coppage, MD; Robert Falk, MD; Elliot K. Fishman, MD; David Gemmel, PhD; Jonathan G. Goldin, MD, PhD; Eric Goodman, MD; Eric M. Hart, MD; Todd Hazelton, MD; Elizabeth Johnson, MD; Philip F. Judy, PhD; Ella Kazerooni, MD; Barbara L. McComb, MD; Geoffrey McLennan, PhD, MBBS, FRACP; Reginald F. Munden, MD, DMD, MBA; James Ravenel, MD; Michael A. Sullivan, MD; Stephen J. Swensen, MD; Karl Thomas, MD; Drew A. Torigian, MD, MA; Glenn Tung, MD; Kay H. Vydareny, MD; John A. Worrell, MD.

##### Lead Site Investigators: LSS

Peter Balkin, MD; Timothy R. Church, PhD; Mona Fouad, MD; Matthew T. Freedman, MD, MBA; Kavita Garg, MD; Edward P. Gelmann, MD; David S. Gierada, MD; William Hocking, MD; Subbarao Inampudi, MD; Claudine Isaacs, MD; Paul Kvale, MD; David A. Lynch, MD; Howard Mann, MD, BCh; William Manor, MD; Hrudaya Nath, MD, MBBS, DMR, MD; Douglas Reding, MD, MPH; David L. Spizarny, MD; Diane C. Strollo, MD; John Waltz, MD.

##### Supporting Statisticians

Mei-Hsiu Chen, PhD; Donald Corle, MS; Fenghai Duan, PhD; Grant Izmirlilian, PhD; Paul Pinsky, PhD; Philip C. Prorok, PhD.

#### **III MAJOR COMMITTEES**

##### Data and Safety Monitoring Board

Edward A. Sausville, MD, PhD, University of Maryland Greenebaum Cancer Center (Chair); Wylie Burke, MD, PhD, University of Washington; Gene Colice, MD, Washington Hospital Center; Brenda Edwards, PhD, Division of Cancer Control and Population Sciences, NCI, NIH; Scott Emerson, MD, PhD, University of Washington; Russell Harris, MD, MPH, University of North Carolina, Chapel Hill; Jeffrey S. Klein, MD, Fletcher Allen Health Care; Edward L. Korn, PhD, Division of Cancer Treatment and Diagnosis, NCI, NIH; Robert Mayer, MD, Dana-Farber Cancer Institute; Joe V. Selby, MD, MPH, Kaiser Permanente Medical Care Program; David W.

Sturges, JD, New Ulm, MN; Bruce W. Turnbull, PhD, Cornell University; Thomas J. Watson, MD Strong Memorial Hospital. Former members: John Fletcher, MD, University of Virginia School of Medicine†; Sylvan Green, MD, Arizona Cancer Center (Chair)†. (†, deceased)

#### Endpoint Verification Team

Anthony B. Miller, MD, University of Toronto (Chair); Martin J. Edelman, MD, University of Maryland Greenebaum Cancer Center; William K. Evans, MD, Juravinski Cancer Centre at Hamilton Health Sciences; Robert S. Fontana, MD, Mayo Clinic; Mitchell Machtay, MD, Jefferson Medical College.

#### Oversight Committee

Robert C. Young, MD, Fox Chase Cancer Center (Chair); David Alberts, MD, Arizona Cancer Center; David DeMets, PhD, University of Wisconsin Medical School; Peter Greenwald, MD, DrPH, Division of Cancer Prevention, NCI, NIH; Paula M. Jacobs, MD, Division of Cancer Treatment and Diagnosis, NCI, NIH; Theresa C. McLoud, MD, Massachusetts General Hospital; David P. Naidich, MD, New York University Medical School; James L. Tatum, MD Division and Cancer Treatment and Diagnosis, NCI, NIH.

#### ACRIN Screening Quality Assurance Committee

Denise R. Aberle, MD; Richard Barr, MD; William C. Black, MD; Jonathan G. Goldin, MD, PhD; Drew Torigian, MD; Kay Vydareny, MD; John Worrell, MD.

#### LSS Screening Quality Assurance Committee

David S. Gierada, MD (Chair); Kenneth W. Clark, MS, MBA; Kathy L. Clingan; Richard M. Fagerstrom, PhD; Glenn Fletcher, PhD; Michael J. Flynn, PhD; Kavita Garg, MD; Frederick J. Larke, MS, DABR; Guillermo Márquez, PhD; Steven M. Moore, MS; Hrudaya Nath, MBBS, DMR, MD; Peter Ohan; Thomas J. Payne, PhD; Jennifer L. Rosenbaum, MPH; Diane C. Strollo, MD; Xizeng Wu, PhD. Former members: Melissa B. Ford, MSN, PhD; Steven Peace, CTR

#### ACRIN Biomarker Research Evaluation Panel and Tissue | Biomarker Oversight Committee

Denise R. Aberle, MD; Stephen Baylin, MD; Neil Caporaso, PhD; Philip Dennis, MD; Fenghai Duan, PhD; Steven Dubinett, MD; Wilbur Franklin, MD; Constantine Gatsonis, PhD; William Grizzle, MD; Fred Hirsch, PhD; Pierre Massion, MD; Kathy McKeeta-Probeck; John Minna, MD; Edward Patz, MD; Margaret Spitz, MD

### **IV NLST TRIAL INVESTIGATORS**

#### **American College of Radiology Imaging Network (ACRIN), Philadelphia, PA**

Program Director, Diagnostic Imaging Branch, Cancer Imaging Program

Barbara Galen, MSN, CRNP, CNMT

Former Branch Chief, Diagnostic Imaging Branch, Cancer Imaging Program

Carl Jaffe, MD

Associate Director, Cancer Imaging Program

Paula M. Jacobs, PhD

#### **American College of Radiology Imaging Network (ACRIN), Philadelphia, PA NLST/ACRIN**

Principal Investigator

Denise R. Aberle, MD

Chief Statistician

Constantine Gatsonis, PhD

Lead Epidemiologist

Ilana Gareen, PhD

#### **ACRIN Headquarters and Data Management Center, Philadelphia, PA**

ACRIN Chair

Mitchell Schnall, MD

Senior Director

Charles Apgar, MBA

NLST-ACRIN Project Manager

Irene Mahon, RN, MPH

Information Technology

Hank Brastater, PMP

Vish Iyer, MS

Jincy George, MCA

Dinakar Gopalakrishnan

Protocol Development and Regulatory

Compliance

Patricia Blair

Michael Bradley, MA

Cheryl Crozier, RN, ASQ, CQA

Maria Oh

Nicole Spiese, MS

Chris Steward

Mary Kelly-Truran, RN, CCRP

Tess Thompson, MPhil

Image Management Center

Erin Cunningham, MHSA

Anthony Levering,

Kathleen McMurtrie

Michael Nahill

Sharlene Snowden

Kesha Smith

Fraser Wilton

Timothy Welsh

Rex Welsh

Administrative Staff

Charles Apgar, MBA  
Anna Boyle  
Tom Caldwell, MBA  
Nancy Fredericks, MBA  
Deborah Harbison  
Donna Hartfeil, RN, BSN  
Sharon Jones  
Steve King, MS, CHE  
Irene Mahon, RN, MPH  
Rosa Medina  
Cindy Masiejczyk  
Leslie Sears  
Peter Zamora

Data Management Staff

Wendell Christie  
Stephanie Clabo  
Roberta Clune  
Natalie Cunningham  
Jamie Downs  
Lindsey Dymond  
Julianne Falcone  
Shani Harris  
Pamela Harvey, MMgt  
Jane Hill  
Laura Hill  
Donna Letizia  
Kendrick Looney

Data Management Staff (continued)

Hugh McGinley  
Angelee Mean, MHA  
Marcella Moore, MBA  
Ryan Norton  
Valentina Ortico  
Sophia Sabina, MBA, RTRT  
Robert Sole  
JoAnn Stetz, RN, RTT  
Arnold Ssali, MPH  
John Stubblefield  
Tina Taylor  
Shovonna White

**ACRIN Biostatistics Center, Brown University, Providence, RI**

---

Director

Constantine Gatsonis, PhD

Faculty Statisticians

Mei-Hsiu Chen, PhD  
Fenghai Duan, PhD  
Bo Lu, PhD

Quality of Life Interviewers

Maryann Duggan  
Cheryl Souza

Lead Epidemiologist

Ilana F. Gareen, PhD

Staff Biostatisticians

Amanda Adams, MPH  
Sarah Baum, MS  
Meridith Blevins, MS  
Patricia Fox, MS  
Vincent Girardi, MS  
Jeremy Gorelick, PhD  
Edward Hunt, MS

Staff Biostatisticians (continued)

Quentin McMullen,  
Karthikeyan Meganathan, MS  
Regina Rendas-Baum, MS  
JoRean D. Sicks, MS  
Bradley Snyder, MS  
Melanie Yeh, MS

**National Cancer Institute, Division of Cancer Prevention, Bethesda, MD NLST/LSS**

---

Project Officer/Chief, Early Detection Research Group

Christine D. Berg, MD

Chief Statistician

Richard M. Fagerstrom, PhD

Associate Project Officer/Chief, Biometry Research Group

Philip C. Prorok, PhD

Lead Epidemiologist

Pamela M. Marcus, PhD

Supporting Statisticians

Donald Corle, MS  
Ping Hu, ScD  
Grant Izmirlan, PhD  
Paul Pinsky, PhD

Biomedical Engineer

Guillermo Marquez, PhD

Information Officer

Dorothy Sullivan

Program Specialist

Jennifer Gaegler

Former Project Officer

John K. Gohagan, PhD

Contract Officer

Susan Hoffman

Contract Specialists

Charles Jackson  
Erin Lange

Contract Specialists (continued)

Mary Loesch  
Evanthia Papadopoulos

**Editor-in-Chief, Journal of the National Cancer Institute, Bethesda, MD**

---

Barnett, S. Kramer, MD, MPH

**Westat, Rockville, MD**

---

Project Director

Brenda K. Brewer, MMSc

PLCO Project Director

Barbara O'Brien, MPH

Corporate Officer

Jack Cahill, MA

Protocol Managers

Melissa B. Ford, MSN, PhD  
Jennifer L. Rosenbaum, MPH

Data Quality Manager

Kathy L. Clingan, BA

CC Coordinators

Nancy Payte, PhD, MPH, CTR  
Helen Price\*

EVP Coordinator  
Kristen J. Keating, PhD

PPA/PPC Coordinators  
Miriam Galbraith, RN, MPH  
Janet Lawler-Heavner, MSPH

Study Managers  
Gillian Devereux, RN, MPH  
Steven Peace, CTR

Systems Manager  
Ramachandra Chanapatna

Systems Staff  
Mike Florczyk  
Alan Morgan  
Peter Ohan  
Leon Tiet

Data Processing Manager  
L. Ellen Martinusen

Medical Record Coders  
Terry Lewis  
Lois M. Roberts

Project Administrator  
R. Adam DeBaugh

Research Assistant  
Vijayasri Narayanaswami

Data Processing Staff  
June McSwain  
Rhonda Rosario  
Jagdish Singh

---

**Information Management Services, Inc., Rockville, MD**

Corporate Officer  
William Lake, Jr

Project Manager  
Jonathan D. Clapp  
Thomas Riley

Senior Systems Analyst  
Joe Austin

Senior Programmer/Analyst  
Andrew S. Goodman  
Brian Irons  
Patrick Wright

Senior Programmer  
Crissy Kibic  
  
Programmer  
Laura L. Hawkins

Systems Analysts  
Gordon C. Jones, MS  
Joshua M. Rathmell  
FangFang Xu, MIS  
Michael Young

---

**Care Communications, Inc., Chicago, IL**

Project Director  
Patricia Sheridan, MBA, RHIA

Project Managers  
Nancy Kadish, MS, RHIA, CAPM

Research Managers  
Denise Moline, RHIA  
Rachel Phillips, RHIA

Abstractors and Cancer Registrars  
Michele Adkinson, CCS  
David Creed, RHIT, CTR  
Tammy DeCoste, RHIT, CTR  
Debbie Gembala, RHIA  
Sally Hurst, RHIA  
Elizabeth King, RHIT

Abstractors and Cancer Registrars  
(continued)  
Joy Knowles, RHIA, CTR  
Pamela McBride, RHIT, CCS  
Patricia Pangburn, RHIT  
Judy Preston, RHIA  
Karen Stokes, RHIT  
Patricia Tesch, RHIA, CTR  
Susan Wenmoth, RHIA

EVP Coders  
Linda Galocy, RHIA  
Deanna Mandley, RHIT, CCS, CCS-P  
Pamela McBride, RHIT, CCS (Arbitrator)  
Gail Orvis, RHIT, CCS

---

**NLST ACRIN SCREENING CENTER STAFF**

**Beth Israel Deaconess Medical Center, Boston, MA**

Principal Investigator  
Phillip M. Boiselle, MD

Co-Investigator  
Richard Schwartzstein, MD

Medical Physicist  
Pei-Jan P. Lin, PhD

CT Manager  
Tim A. Parritt

Diagnostic Radiology Manager  
Elisabeth A. Grady

Study Coordinator  
Lisa Damon, MS

Research Nurses  
Sharon Gard, RN  
Robin Griggs, RN  
Alexis Potemkin, RN

Research Associate  
Mary M. Pollock, RN  
  
Regulatory Staff  
Tamara Owens

Research Assistants  
Sara Mc Clellan, MA  
Melissa Laron, MS



**Brigham and Women's Hospital, Boston, MA**

---

Principal Investigators

Philip Costello, MD, FACR, FRACR  
Francine L. Jacobson, MD, MPH  
Philip F. Judy, PhD

Co-Investigators

Andetta R. Hunsaker, MD  
Paul W. Spirn, MD  
Beatrice Trotman-Dickenson, MD, MBBS

Medical Physicist

Richard D. Nawfel, MS

Study Coordinators

Voula E. Christopoulos  
Ivana K. Kazda, DDS, MPH  
Regina C. MacDougall, RN, BSN, CVN  
Annmarie Walsh

Radiologic Technologists

Robert Berger  
Pearl Chan  
Mark Delano  
Jeffrey Geiger

Radiologic Technologists (continued)

Carl Krinopol  
Ann D. McGinnis  
Angela M. McLaughlin  
Raymond Weatherby

**Brown University, Rhode Island Hospital, Providence, RI**

---

Site Principal Investigators

Gerald Abbott, MD  
Glenn Tung, MD

Co-Investigator

Martha Maineiro, MD

Study Coordinators

Lila Camara  
Cindy Cobb  
Wendy Smith

Research Associates

Susan Foley  
Elizabeth Morrell  
Diane Romano

Secretary

Darlene Guillette

**The Cancer Institute of New Jersey, New Brunswick, NJ**

---

Principal Investigator

Judith K. Amorosa, MD

Co-Investigators

Joseph Aisner, MD  
Murray Backer, MD  
Mark Bramwitt, MD  
Victor de Carvalho, MD  
Robert Epstein, MD  
Peggy Joyce, APN  
John E. Langenfeld, MD  
Ann Reinert, APN

Research Team

Kevin DeMarco, MD  
Stuart Lutzker, MD  
Rita Musanti, APN  
Steven Shiff, MD  
Tammy Wolfsohn, MS

Study Coordinators

Marisol Furlong  
Colleen Hudak  
Andrea Hugill, RD  
Srivani Konduri  
Elayne Weslowsky

Laboratory Technicians

Sharon Carmen  
Denise L. Foster  
Kenneth Hansen  
Bernadette Pennetta  
Linda V. White

Medical Physicist

Robert Tokarz, MS, DABR

Recruiter

Ana Birofka

Regulatory Staff

Maryann Trotta

**Dartmouth-Hitchcock Medical Center, Lebanon, NH**

---

Principal Investigator

William C. Black, MD

Co-Principal Investigators

Claudia J. Kasales, MD  
Petra J. Lewis, MB

Medical Physicist

John B. Weaver, PhD

Study Coordinator

Suzanne B. Lenz, MA

Project Assistants

Angelica C. Barrett  
Raymond X. Dauphinais  
Jennifer R. Heinz  
Matthew K. Siemionko  
AmiLyn Taplin  
Lisa Scott Wasson, MS

Recruitment

Linda DeAlmeida  
Sharon Longacre  
Katherine Meagher  
Carol M. Moser

Student Assistants

John K. Lawlor, III  
Casey O'Quinn

CT Technologists

Nancy E. (Krieger) Black  
Heather L. Bradley  
Jill K. Bronson  
Timothy Cosgrove  
Mark K. Haron

CT Technologists (continued)

Donna King  
Pamela M. Mazuerk  
Neil F. O'Donnell  
Daniel J. Pluta  
Terry J. Sackett  
Ginette D. Turgeon

X-Ray Technologists

Henry Albano  
Courtney Bell  
Jerry Bergen  
Gail Bizer  
Nicole M. Carmichael  
Crista Cimis  
Stephanie Davis  
Tony DeAngelis  
Gail Fellows  
Charlie Fenton  
Joy Ferola  
Nancy Gankiewicz

X-Ray Technologists (continued)

Dorothy Hastings  
Chris Howell  
Mary E. Johnson  
Mary Krisk  
Heather Lancor  
Christie Leary  
Maurice LeBlanc  
Adam Leming  
Mandie Leming  
Dawn Mead  
Michael Milacek  
Jamie Mood

X-Ray Technologists (continued)

Heidi Nordstrom  
Carolyn Palazzolo  
Jeremy Pierce  
Richard P. Remitz  
Jessica Rider  
Kathleen A. Robbins  
Brenda Sleasman  
Jason Spaulding  
Cam Vashel  
Amie Welch  
Linda White  
Mark Whitty

**Emory University School of Medicine, Atlanta, GA**

---

Principal Investigator

Kay H. Vydareny, MD

Clinical Research Coordinator

Angela M. Williams, RN

Medical Physicist

Andrew Karellas, PhD

Research Project Coordinators

Leeta Grayson, MPH  
Carlotta McCalister-Cross  
Sherri Mesquita, MSW  
Anne Nguyen, MPH

Research Interviewer

Laura N. Myers

Data Entry

Eric Deaton

**Jewish Hospital Heart and Lung Institute, Louisville, KY**

---

Principal Investigator

Robert Falk, MD

Site Co-Investigators

Sharon Maxfield, MD  
Kevin Thomas

Director, Cancer Services

Laura Brenzel, RN, OCN, MBA

Lead Coordinator

Pamela Allen, RN, CCRP

Research Coordinators

Denise Brooks, RT  
Carla Chadwell, RN  
Elizabeth Couch, CCRP  
Amanda DeVore, MHSA  
Rubenia Flores, MD  
Melba Francis, RN

Research Coordinators (continued)

Sarah Landes, MS  
Jacinta Mattingly, RN, OCN  
Margaret Oechsli, PhD, CCRP  
Bethany Pitino  
Shawn Sams, RN  
Olga Soukhanova, MD

Data Management Assistants

Priscilla Bland  
Sheron Bube  
Tricia Hoffa  
Becky McElsain

Medical Assistant

Demetria Johnson

Data Abstractors

Cathy Francow  
Stephenie Johnson  
Pam Senn

**Johns Hopkins University School of Medicine, Baltimore, MD**

---

Principal Investigator

Elliot K. Fishman, MD, FACR

Co-Investigators

Karen M. Horton, MD  
Leo P. Lawler, MD

Medical Physicist

Mahadevappa Mahesh, PhD

Study Managers

Lynne Bradford  
Gale Christensen, RN

Research Coordinators

Janet Bishop  
Laura Motley  
Deborah Robertson  
Robin Stewart

Bio Markers

Rex Yung, MD  
Mingying Zeng, MD

Research Assistants  
Heather Bishop Blake  
Holly Bradford  
Jenna Bradford  
James Burner  
Jeremy Christensen  
Jennifer Christensen, MB, TM  
Carmen Guzman

Research Assistants (continued)  
Jennifer Kasecamp  
Jennifer Bishop Kaufmann  
Daniel Kimball  
Zipporah Lewis  
Sheila Moesinger, RN  
Susan Walsh, RN  
Karen Taylor

IT Support Staff  
Greg Gambill  
Sarah Merrill

**Mayo Clinic, Jacksonville, FL**

---

Principal Investigator  
Barbara L. McComb, MD

Co-Principal Investigator  
Elizabeth A. Johnson, MD

Co-Investigators & Quality Assurance  
Howard I. Jolles, MD  
Ronald S. Kuzo, MD  
Richard L. Morin, PhD

Study Coordinators  
Reza Abaya, RN  
Deborah Chewar, RN  
Patricia Shwartz

Laboratory Technicians  
Susan Allen, MT  
Shalonda Manning

Pulmonary Technicians  
Mary Adams  
Zafar Awan  
Lisa Beagle  
Deanna Cape  
Tanya Zeiger

X-Ray Technologists  
Laurie Amendolare  
Noel Bahr  
Minnetta Belyea  
Tara Berg  
Mia Burkhard  
Lisa Cottrell  
Katherine DeAngelis  
Melanie Dvorak  
L. Heather Binnicker Gay  
Kelly Hatton

X-Ray Technologists (continued)  
Sharon Jacoby  
Valene Kennedy  
Kathleen Krach  
Melissa Laughren  
Cindy Lavergne  
Marsha Lawrence  
Jeannette Lynch  
Amber McDonald  
Felix Mestas  
Julie Moody

X-Ray Technologists (continued)  
Carrie O'Brien  
Janice Pitts  
Brenda Polding  
Lindsay Richardson  
Karen Robinson  
Amy Warren  
Holly Washburn  
Erik Wilson  
Luis Zagarra

CT Technologists  
Karen Mathews Batton  
David Chellini  
Kathleen DeWitt  
Darlene R. Fleming

CT Technologists (continued)  
Christi Newton-Foster  
Kathleen Krach  
Renee MacDonald  
Carrie O'Brien  
Jennifer Ott  
Julie Peterson

CT Technologists (continued)  
Michele Sallas  
Michael Teepe  
Rachel Thomas  
Kathy Torrence  
Luis Zagarra

**Mayo Clinic, Rochester, MN**

---

Principal Investigator  
Stephen J. Swensen, MD

Co-Investigators  
Thomas E. Hartman, MD  
James R. Jett, MD  
Cynthia H. McCollough, PhD  
David E. Midthun, MD

Study Coordinators  
Boleyn R. Andrist  
Nancy E. Hanson  
Connie L. Sathre  
Laura D. Schroeder  
Jacqueline R. Sheeran  
Lana C. Walters

Other Study Staff  
Cynthia L. Andrist  
Aaron O. Bungum  
Cathy L. Bornhorst

Other Study Staff, (continued)  
Dawn M. Deno  
Tami S. Krpata  
Ann M. Lambrecht

Other Study Staff, (continued)  
Christine M. McKey  
Delores K. Prudoehl  
Helena R. Richter

**Medical University of South Carolina, Charleston, SC**

---

Principal Investigator  
James Ravenel, MD

Co-Principal Investigator  
Philip Costello, MD

Study Coordinator  
Alan Brisendine

Research Associates  
Tricia Adrales-Bentz, MHA, CCRP  
Krystal Arnold  
Brad Benjamin  
Andrew Dodd, MS

Data Entry  
Laura Bailey  
Hanna Comer  
Joy Espiritu, MHA

Research Associates  
John Keller  
Tamara Saunders

Data Entry (continued)  
Stephanie Helwi  
Brandy Mack-Pipkin  
Paola Spicker, MBA

QC / Internal Auditor  
Susan Shannon

---

**Moffitt Cancer Center, Tampa, FL**

Principal Investigators

Robert Clark, MD  
Lynn Coppage, MD  
Todd Hazelton, MD

Co-Investigator

Melvin Tockman, MD, PhD

Lead RAs

Beth Evans, RN, CCRC  
Nina Wadhwa, MSPH

Study Coordinators

Natalie Baptiste  
Courtney Eysmans  
Naima Vera-Gonzalez

Data Specialists

Lori Hamm  
Veenu Harjani  
Anna Sear

Management Assistant

Susan Blackwell, MPH

Regulatory Staff

Lori Kirchoff

Laboratory Technicians

Adys Fernandez  
Edwin Williams

Medical Physicist

Kenneth A. Coleman, ME, DABMP,  
DABSNM

Computer Support

Jay Afiat

Radiology Department Staff

Rob Bowman  
Chris Brothers  
Barry Cohen  
Nicole Fields  
Richard Guzman

Radiology Department Staff (continued)

Celeste Monje  
Winston Sterling  
Loretta Thorpe  
Kevin White  
Buddy Williams

---

**Northwestern University Feinberg School of Medicine, Chicago, IL**

Principal Investigator

Eric M. Hart, MD

Research Coordinator

Erin Nekervis

Medical Physicist

Eric Berns, PhD

NLST Research Associates

Andrea Franco  
Irena Glick  
Marcello Grigolo  
Yassminda Harts  
Arthur Migo  
Kelli P. Rockwell  
Adam Stein  
Ryan Weyls, MA

Radiologic Technologists

Michele T. Biringer  
Angela Del Pino  
Peter Dubbs  
Glenna M. Fehrmann  
Alan Lee Goodwin  
Loretta Granger  
Julie Haglage  
Jenny Hirschy

Radiologic Technologists (continued)

Mollie King  
Jodi Wietharn Kristopher  
Nicole Matetic Mac  
George Mahony  
Armen Markarian  
Martha Ramirez  
Michael Taylor  
Kelli M. West

---

**Ochsner Medical Center, New Orleans, LA**

Site Principal Investigator

Michael A. Sullivan, MD

Co-Investigator

Charles C. Matthews, MD

Medical Physicist

Jerome Jones, PhD

Study Coordinators

Aura Cole  
Pamela Dow, RN  
Jacqueline Fearon  
Brent Fodera, MS  
Barbara Ginther, RN  
Rachel L. McCall  
Shannon Williams, RT  
Serelda Young, RN

Research Assistants

Cristine Juul  
Angele LaFleur  
Alison Schmidt  
Shannon Wright  
Katherine Lohmann  
Lisa Pineda

Data Entry Staff

Sheila Greenup, RN  
Kelly McNulty  
Stephanie Pawlak  
Heather Porter

Data Support Staff

Teresa Lanning, RN  
Debra Loria, RN

**St. Elizabeth Health Center, Youngstown, OH**

---

Principal Investigators

Richard G. Barr, MD, PhD  
David Gemmel, PhD  
Albert Cook II, MD

Study Coordinators

Alice DuChateau, MSN  
Catherine Engartner, MSN  
Dianalyn M. Evans, BSN  
Cheryl Love  
Patricia Schuler, MSN

Physicist

Robert Kobistek

Research Secretary

Jo Ann Hallsky

Research Associates

Anthony Boulos  
Pritha Dalal  
Ben Dickstein  
James Evans  
Kaylene Evans  
Mary Gemmel  
Sarah Hallsky  
Phil Hoffman

Research Associates (continued)

Craig Hritz  
Lorraine Kerchum  
Mallory Kolich  
Mark Kolich  
Melody Kolich  
Neha Kumar  
Judith Lobaugh  
Dayna Love

Research Associates (continued)

Melissa Love  
Maria Marchese  
Deana Nelson  
Carrie Petkus  
Marcella Petruzzi, MT  
Cristina Raver  
Erin Schuler  
David Schultz

Lab Technicians/Phlobotomists

Jacqueline Jackson  
Johanna Ziegler

Radiologic Technologists

Marian Acerra  
Beverly Brittain  
Lisa Conklin  
Cindy Cyphert  
Brenda Delfosse  
Leanne Franceshelli  
Joan Fuller  
Donna Garland  
Peggy J. Gocala  
Mauren Grunenwald  
Diane Kowalik

Radiologic Technologists (continued)

Sharon L. Kurjan  
Patricia Lavernick  
Julie Maderitz  
Renee Metz  
Roberta Quinn  
Marlene Semansky  
Stacy Smith  
Amy St.Claire  
Pamela Taybus  
Diana Wisler  
Karen Zubena

Respiratory Technicians

Jennifer Fleischer  
Linda L. Welch

**University of California at Los Angeles, Los Angeles, CA**

---

Principal Investigator

Jonathan G. Goldin, MD, PhD

ACRIN NLST National Study Coordinator

Catherine Duda, MPH, DrPH

Co-Principal Investigator

Denise R. Aberle, MD

Nurse Coordinators

Polly Kay, RN  
Patty Trapnell, RN  
Maria Vlachou, RN

Physicists

Chris Cagnon, PhD  
Michael McNitt-Gray, PhD

Recruiters

Jill Spivak  
Maisha Pollard

Staff Research Associates

Eng Brown  
Olivia Campa  
Barbara Carter  
Sonya Clark  
Marvin Flores  
Judy Ho

Staff Research Associates (continued)

Tracy Lee  
Barbara Lewis  
Janie McMahan  
Lea Momongan  
Julie Ngo  
Adele Perryman  
Nicole Rivas

Staff Research Associates (continued)

Christina Romo  
Kanistha Sookpaisal  
Lily Stone  
Barbara Voight, NP  
Carleaner William

Data Entry

Kellyn Adams  
Phi Do  
Kerry Engber  
Leslie Henry  
Michael Khalili  
Sandy Morales  
Chelsea O'Carroll  
Jade Quijano

Radiology Technologists

Shiva Borgheian  
Roger Inatomi  
Alfonso Lorenzo  
Dinah Lorenzo  
Glen Nyborg  
Vinis Salazar  
Michael Woo

Administrative Staff

Brandon B. Bigby  
Audrey Gallego

**University of California at San Diego, San Diego, CA**

---

|                                                                                                      |                                                                                                                                   |                                                                                                                                  |
|------------------------------------------------------------------------------------------------------|-----------------------------------------------------------------------------------------------------------------------------------|----------------------------------------------------------------------------------------------------------------------------------|
| <u>Principal Investigator</u><br>Eric Goodman, MD                                                    | <u>Research Associates</u><br>Paige Beck                                                                                          | <u>Administrator</u><br>Kathleen Voight                                                                                          |
| <u>Regulatory Associates</u><br>Paula Beerman<br>Jean Jacobsen<br>Roxana Phillips<br>Alice Vranceanu | <u>Study Coordinators</u><br>Erich Allman<br>Sabrina Chen<br>Cristina Farkas<br>Isabelle Forter<br>Ganesh Kulkarni<br>Larissa Low | <u>Study Coordinators (continued)</u><br>Paul Marcus<br>Lonna Matthews<br>Jessica Silva-Gietzen<br>Erica Sturgeon<br>Gina Varner |

**University of Iowa, Iowa City, IA**

---

|                                                                                                       |                                                                                                        |                                                                                             |
|-------------------------------------------------------------------------------------------------------|--------------------------------------------------------------------------------------------------------|---------------------------------------------------------------------------------------------|
| <u>Principal Investigator</u><br>Geoffrey McLennan, PhD, MBBS,<br>FRACP<br>Karl Thomas MD             | <u>Co-Investigators Radiologists</u><br>Brian Mullen, MD<br>William Stanford, MD                       | <u>Co-Investigator</u><br>Eric Hoffman, PhD<br><u>Study Coordinator</u><br>Kim Sprenger, RN |
| <u>Research Assistants</u><br>Andrea Chapman<br>Kaylene Crawford<br>Jacquie Marietta<br>Leslie Kmetty | <u>Research Assistants (continued)</u><br>Jackie Meier<br>Phyllis Piroette, RN, BSN<br>Laurie Rathmell | <u>Radiologic Technologists</u><br>Melissa Hudson<br>Jered Sieren                           |

**University of Michigan Medical Center, Ann Arbor, MI**

---

|                                                     |                                                                                                                           |                                                                                                                           |
|-----------------------------------------------------|---------------------------------------------------------------------------------------------------------------------------|---------------------------------------------------------------------------------------------------------------------------|
| <u>Principal Investigator</u><br>Ella Kazerooni, MD | <u>Co-Investigators</u><br>Paul Cronin, MD<br>Barry Gross, MD<br>Aine Kelly, MD<br>Smita Patel, MD<br>Perry Pernicano, MD | <u>Study Coordinators</u><br>Gwen Chalom<br>Tami Harper<br>Eric Henricks<br>Jim Pool<br>Diane Shepherd<br>Deanna Zapolski |
| <u>Lead Research Assistant</u><br>Lisa Holloway     |                                                                                                                           |                                                                                                                           |
| <u>Medical Physicist</u><br>Mitch Goodsitt, PhD     | <u>Recruiter</u><br>Hope Hooks                                                                                            |                                                                                                                           |

**University of Pennsylvania School of Medicine, Philadelphia, PA**

---

|                                                                |                                                             |                                                                                               |
|----------------------------------------------------------------|-------------------------------------------------------------|-----------------------------------------------------------------------------------------------|
| <u>Site Principal Investigator</u><br>Drew A. Torigian, MD, MA | <u>Co-Principal Investigator</u><br>Warren Gefter, MD       | <u>Nurse Research Coordinator</u><br>D. Lynn Werner, RN, CCRC                                 |
| <u>Research Coordinator</u><br>Catherine E. Smith              | <u>Data Managers</u><br>Byung Kun Choi<br>Joon K. Lee       | <u>Research Assistants</u><br>Christine Holland<br>Jacqueline Matuza, MPH<br>Hilary C. Nosker |
| <u>Spirometry</u><br>William Russell, RPFT                     | <u>Physicists</u><br>Scott Cupp, MBS<br>Michael O'Shea, PhD |                                                                                               |

**University of Texas, MD Anderson Cancer Center, Houston, TX**

---

|                                                                 |                                                                |                                                                                          |
|-----------------------------------------------------------------|----------------------------------------------------------------|------------------------------------------------------------------------------------------|
| <u>Principal Investigator:</u><br>Reginald Munden, MD, DMD, MBA | <u>Physicists</u><br>Dianna Cody, PhD<br>William R. Geiser, MS | <u>CT and X-Ray Technologists</u><br>Jerry L. Montague<br>Minesh Patel<br>Tonda Robinson |
| <u>Study Coordinators</u><br>Melissa Cates<br>Eric Sanchez      |                                                                |                                                                                          |

Research Staff

Michelle Aganon-Acheta, RN  
Michael Black  
Dalphany Blalock, RN  
Cynthia Brown, RN  
Hattie Cromwell  
Joel Dunnington, MD  
Jeremy Erasmus, MD  
Gregory Gladish, MD

Research Staff (continued)

Sanjay Gupta, MD  
Michelle Wann Haynes  
Thomas Hensley  
Revathy B. Iyer, MD  
John Madewell, MD  
Tamim Malbari  
Research Staff (continued)  
Edith M. Marom, MD  
Rodolfo Morice, MD

Research Staff (continued)

Sujaya Rao, MS  
Carol Read, RN  
Bradley Sabloff, MD  
Natalie F. Scully, PhD  
Sangeeta Tekchandani  
Mylene Truong, MD  
Danielle Wicks

**Vanderbilt University School of Medicine, Nashville, TN**

Site Principal Investigator

John A. Worrell, MD

Co-Investigators

Edwin F. Donnelly, MD, PhD  
Pierre Massion, MD

Research Associate

Elizabeth Thielke, RN, MSN

Research Assistant

Allie M. Bell

Medical Physicist

David R. Pickens, PhD

Assistant Administrative Director,  
Department of Radiology

Walter Allen Bowman, MA, CRA, RT(R)

CT Senior Specialty Technologist

Tina Herron

Chief Technologist, Nuclear Medicine

Dawn Shone

Research Volunteer

Brian Chin, MD

**Wake Forest University School of Medicine, Winston-Salem, NC**

Principal Investigator

Caroline Chiles, MD

Study Coordinators

Lisa Harmon  
Lisa Hinshaw, MPH  
Carolyn Nelson

Research Nurses

Elaine Bowman, RN  
Susanna Dyer, RN  
Patti Peacock, RN

Co-Principal Investigator

Michael Chen, MD

Research Associates

Donna Biracree  
Denise Boyles  
Anne Burrough, MS

Research Associates (continued)

Amanda Davis  
Elliott Drake

Research Associates (continued)

Eileen Frost, MS  
Ashley Long

**NLST/LSS SCREENING CENTER STAFF**

**Georgetown University Medical Center, Washington, DC**

Principal Investigators

Edward P. Gelmann, MD  
Claudine Isaacs, MD

Radiologists

Alphonso Dial, MD  
Letitia Clark, MD  
Lawrence Cohen, MD  
Joanne Gerber, MD  
Carlos Jamis-Dow, MD  
Erini Makariou, MD  
Ed Smith, MD

Study Coordinators

Amy Garrett, MA, CCRC  
Colleen McGuire, RN, MSN  
Sarah Neff, MPH  
Tara Riley

Co-Principal Investigator and  
Lead Radiologist

Matthew T. Freedman, MD, MBA

Medical Records Abstractors

Alex Barriera, CTR  
Sara Cantrell, CTR  
Glynis Marsh, CTR  
Chripina Wray, CTR  
Baigalmaa Yondonsambuu, MD, CTR

Medical Record Coordinator

Ulander Giles

Recruitment Coordinator

Morgan Ford, MPH

Data Managers

Venus Brown  
Amy Lita Evangelista  
Tiffanie Hammond  
Jillian Nickel

Research Assistants

Michael Brangan  
Michele Lee  
Cindy Lin

CT and X-Ray Technologists

Elanor (Candi) Adkins  
George Armah  
Christopher Blue  
Venetia Cooke  
Natalie Gray  
Marianna Gustitis  
Lakisha Hawkins  
Grace Isaacs  
Mimi Kim

CT and X-Ray Technologists

Malcolm King  
Kanya Kumbalasisiri  
Robin Laura  
Kelly McDaniel  
Alem Mulugeta  
Leroy Riley  
Shane Sorrell  
William Thomas  
Lisa Woodard

**Henry Ford Health System, Detroit, MI**

---

Principal Investigator/Pulmonologist

Paul Kvale, MD

Co-Investigators/Epidemiologists

Christine Cole Johnson, PhD  
Martin Tammemagi, PhD, DVM

Co-Investigators/Radiologists

David Spizarny, MD  
Carl J. Zylak, MD

Co-Investigator/Medical Physicist

Michael Flynn, MD

Grant Administrators

Evangeline Griesemer  
Bonnie Kwit

Programmer

Yasmeen Hafeez  
Noel Maddy

Clinical Staff

Patricia Fantuz  
Beth McLellan  
Dawn Simmons

Biostatisticians

Gordon Jacobsen PhD  
Steadman Sankey, PhD  
Lonni Schultz, PhD

Data Managers

LaTonja Davis  
Rodkise Estell  
Susanne Kozakowski  
Jennifer Rowe  
Merideth Stanley  
Xuli Zhang

Project Coordinators/Research Staff

Kalin Albertsen  
Karen Broski  
Gena Kucera, PhD  
Kathleen Poler, MPH  
Cheryl Spoutz-Ryan  
Dawn Thomas, MPH

Abstractors

Mary Ellen Frebes  
Margaret Paquette  
Mirjana Tecmire  
Claudia Tye  
Laura Young

Data Entry Staff

Deborah Greene  
Cynthia Hill  
Kathleen Young

Interviewers

Karen Bellware  
Kay Bohn  
Nancy Caird  
Helen Fink  
Sandra Fiarman  
Melissa Houston  
Ann Jolly

Interviewers (continued)

Carissa Krzeczowski  
Cynthia Mack  
Lakeshia Murray  
Anna Nanovski  
Debra Rempinski  
Heather Tumberlinson  
Debbie William

Administrative Support

Eleace Eldridge-Smith  
Vanessa Graves  
Nora Szabo

**Marshfield Clinic Research Foundation, Marshfield, WI**

---

Principal Investigator

Douglas Reding, MD, MPH, FACP

Radiologist

William Manor, DO

Medical Physicist

Randall Kruger, PhD

Co-Principal Investigator

William Hocking, MD

Pulmonologist

John Crump, MD

Epidemiologist

Robert Greenlee, PhD

Study Coordinator and Manager

Karen Lappe, BSN

Medical Records Abstractors

Denise Kriescher, RN

Recruiter

Virginia Fischer, MS

Assistant Manager and Data Manager

Deb Multerer

Amy Vieth, BSN

Sheila Wein, BSN

CMA

Kay Mathiesen-Viergutz

LPN

Karen Kofka



Medical Abstraction

Dawn Fuehrer  
Christine Gjertson  
June Krebsbach  
Craig Kuhlka  
Karen Luttrup, CTR  
Judy Netzer  
Jean Wegner

Appointment Coordinators

Nikki Jablonsky  
Brooke Johnson  
Terrie Kitchner  
Lin Mueller  
Amy Rueth  
Shirley Wachholz

Data Entry/Office Staff

Kari Bohman  
Marilyn Bruger  
Kari Ranae Kramer  
Katie Kuenhold  
Camille Mueller  
Cathy Mueller  
Laura Multerer  
Sue Zahradka

Radiologists

Janan Alkilidar, MD  
Nandita Bhattacharjee, MD  
Christopher Cangelosi, MD  
Robert Carlson, MD  
Alon Coppens, MD  
Margo Cousins, MD  
Barry Edelstein, MD  
Kristin Gerndt, MD

Radiologists (continued)

Jeffrey Heffernon, MD  
Thomas Hinke, MD  
Mark Hinson, MD  
Lawrence Hutchins, MD  
Mark Hinson, MD  
Lawrence Hutchins, MD  
Kristin Lieberman, MD  
William Manor, DO

Radiologists (continued)

Gerald Mulligan, MD  
Emmanuel Omoba, MD  
Todd Risa, DO  
John Sheflin, MD  
Tim Swan, MD  
John Warner, MD  
Alan Williams, MD

**Pacific Health Research & Education Institute, Honolulu, HI**

---

Principal Investigator

Lance Yokochi, MD, MPH

Co-Principal Investigator

Peter Balkin, MD

Co-Investigators

Roy Adaniya, MD  
Karen Glanz, PhD  
James Navin, MD  
Vicki Shambaugh, MPH, MA  
Frank Tabrah, MD  
Bradley Willcox, MD  
Paulette Williams, DrPH

Co-Investigator/Senior Biostatistician

Qimei He, PhD

Study Coordinator

Victoria Jenkins, BSN, MEd

Medical Records Abstractors

Kathleen Bow, BSN, Lead  
Jean Tsukamoto, RN  
Shirleen Hyun

Data Manager

Louisa Turner

Data Assistants

Gladys Hino  
Anne Chung

Programmers

Ed Brown  
Howard Morrow

Clinic Supervisors

Kimberly Stryker, RN  
Helene Shiratori, BSN

Research Associates

Peggy Lau  
Donna Au

Recruitment / Retention

Wendy Francis  
Liz Dolan

Research Assistants

Jazman Brooke  
Marilyn Calulot  
Victoria Chun  
Kathryn Rabanal  
Joy Tani  
Cheryl Lewis  
June Morfit

Research Assistants (continued)

Amy Brunst  
Constance Elbon-Copp  
William Huynh  
Myrle Johnson  
Esther Nakano  
Lilian Villaruz

**University of Alabama at Birmingham, Birmingham, AL**

---

Principal Investigator

Mona N. Fouad, MD, MPH

Co-Principal Investigator and Lead

Radiologist

Hrudaya Nath, MD

Co-Principal Investigators

William C. Bailey, MD  
Robert Garver, MD

Physicist

Xizeng Wu, PhD

Radiologists

Dale Brawner, MD  
Ian Malcomb, MD  
Desiree Morgan, MD  
Patricia C. Sanders, MD  
Arthur Sandy, MD  
Martin Schwartz, MD  
Satinder Singh, MD

Pulmonologist

Mark Dransfield, MD

Study Coordinators

Darlene Higgins  
Alisha Moore, CRNP

Data Management Staff

Aras Acemgil  
Tony Blake  
Jing Lee  
Sam Quattlebaum  
Julie Schach

Data Entry

Tawny Martin

Lead Abstractor

Rekha Khatri, MD, MPH, CTR

Interviewers/Schedulers

Shari Jordan

Vicki Prayer

Carole Walker

Clinical Center Staff

Carolyn Johnson, RN

Julie Sears, RN

Medical Records Abstractors

Wahied Gendi, MD

Beverly Powell, CRNP

Recruitment/Retention Staff

Mel Johnson

Joanice Thompson

**University of Colorado Denver, Aurora, CO**

---

Principal Investigator

E. David Crawford, MD

Co-Principal Investigator

Kavita Garg, MD

Medical Physicist

Frederick J. Larke, MS, DABR

Co-Investigators

Paul Bunn, Jr., MD

Eduard Gamito

David A. Lynch, MB

Sheryl Ogden, RN

Project Coordinators

Shannon Pretzel

Lauren Ramsay, PA-C

Carol Vaughn

Recruitment Coordinators

Donna Sammons

Laura Springhetti

Clinic Coordinator

Cheri Whiton, RN

Medical Records Abstractors

Nichole Cadez

Sydney Laster

Hispanic Recruitment Coordinator

Sally Tenorio, RN

Programmer

Colin O'Donnell

Data Managers

Joe Hughes

Jennifer Garcia Livingston

Garry Morrison

Wendy Moss

Merri Mullennix

Marissa Peters

Hakan Sahin, MD

Meredith Slear

Clinic Assistants

Mike Burck

Carolyn Hill

Emily Jewitt

Administrative Assistants

Eda Ordonez

Gina Sammons

Imaging Library Assistant

Ryan Pena

Student Assistants

Jhenny Hernandez

Alejandra Reyes

Analisa Somoza

**University of Minnesota School of Public Health, Minneapolis, MN**

---

Principal Investigator

Timothy R. Church, PhD, MS

Co-Principal Investigator

Martin Oken, MD

Co-Investigator

Subbarao Inampudi, MD

Medical Physicist

Thomas J. Payne, PhD

Radiologists

Deborah Day, MD

Kevin Edelman, MD

Tammy Fox, MD

Scott Gaerte, MD

Karla Myra-Bloom, MD

Radiologists (continued)

Michael Plunkett, MD

Frederick Olson, MD

Paul Rust, MD

Lisa Schneider, MD

Beverly Trombley, MD

Thomas Vahey, MD

Data and Computer Support Staff

Aaron Zirbes

Data and Computer Support Staff

Ann Bangerter  
Terri David-Schlegel  
Donna DesMarais  
Sue Frederickson  
Mindy Geisser  
Natalya Portnov  
Greg Silverman  
Frank Strahan  
Simone Vuong  
Gavin Watt  
Joe Woodside  
Aaron Zirbes

Medical Records Abstractors and Support Staff

Sophie Breer  
Cheri Haselhuhn  
Cathy Longen  
Candace Mueller  
Marianne Rice  
Deb Warren

Phoning Staff

Susan Collins  
Stephanie Levi  
Janet Manual  
Lea Matous  
Phyllis Olsson  
Sue Peterson  
Christopher Rogers  
Mary Lynn Steele

Minneapolis Screening Center Nursing Staff

Patty Beckmann  
Linda Jurjans  
Shirley Terrian

Minneapolis Screening Center Administration Support Staff

Sally Fraki  
Martha Fronheiser  
Linda Heinrichs  
Deb Kirby  
Jackie Seivert  
Carol Steinberg  
Marge Watry

St. Cloud Screening Center Administration Support Staff

Karen Boyle  
Andrew Burnside  
Renae Kiffmeyer  
Wendy Mosiman

Indianapolis Screening Center Administration Support Staff

Angie Bailey  
Pamela Byrnes  
Laura Stark  
Mary Weston  
Dawn Whistler

Coordinators

Jill Cordes  
Deb Engelhard

Administrative Support Staff

Jackie Becker  
Peggy Bradley  
Jim Fisher  
Ryan Lee  
Heather McLaughlin  
Ana Maria Mendez  
Gabrielle Meyer  
Deanna Miller  
Krista Palmquist  
Rosalie Ronan  
Brad Sigal

**University of Pittsburgh Medical Center, Pittsburgh, PA**

---

Principal Investigator

Joel L. Weissfeld, MD, MPH

Co-Investigators

Mark D. Salerno, MD  
Jeffrey Schragin, MD, MPH  
Diane C. Stollo, MD  
Thomas E. Warfel, MD  
Patrick W. Wolfe, MD

Coordinator

Jeffrey Schragin, MD, MPH

Data Manager

Kathy McDonough

Radiologists

Dominick A. Antico, MD  
Matthew T. Bee, MD  
Donald F. Bittner, MD  
William T. Corey, MD  
Robert A. Hawkins, MD  
William T. Herbick, MD  
Mukesh P. Karwat, MD

Radiologists (continued)

Kevin J. Leonard, MD  
Constantine N. Petrochko, MD  
Scott F. Pickering, MD  
Paul E. Smart, MD  
Phyllis J. Walters, MD  
Jane A. Zehner, MD

Recruiters

Karen Augustine  
Sue Misko  
Monica Richel  
Mary Alyce Riley, RN, MSN  
Linda Warren, RN

Medical Record Abstractors

Beverly Rozanok, CTR  
Jeffrey Schragin, MD, MPH

Data and Computer Support Staff

Juanita Helms  
Peggy Olson  
Steve Uttecht  
Mike Wirth

Administrative Support Staff

Roni Atkins  
Lisa Clement, CRNP  
Deb Gurtner  
Laura Jones

**University of Utah Health Science Center, Salt Lake City, UT**

---

Principal Investigator

Saundra S. Buys, MD

Lead Radiologist

Howard Mann, MD

Study Coordinators

Gabe Herron

Eduard Van Stam

Julie Varner

Medical Imaging Manager

Bruce Neilson

Data Collection and Data Entry Staff

Adriane Andersen

Neil Argyle

Jennifer Avrin

Jennifer Bacon

Mark Broschinsky

Chani Montalbo

Kimberly Nolan

Anne Randall

Study Radiologists

Ralph Drosten, MD

Kathleen Murray, MD

Kenneth Nowers, MD

Research Nurse

Karen O'Toole, RN

Data Managers

Cassie Olson

Derek Omori

Data Collection and Data Entry Staff(continued)

Karen Schleip

Scott J. Sheltra

Roger Tischner

Christopher Toyn

Kyle Turner

Brianna Whittaker

Eddy Wicklander

Jacob Wolf

Physicists

Peter Jenkins, MD

Dave Tripp, MD

Lead /Medical Record Abstractor

Julie Varner, CPC, CTR

PACS Administrator

Tony Jones

Recruitment Staff

Cherie Dalton

Briar Doi

Jeff Childs

Lisa Gren

Anne Randall

Darcy Watson

Radiologic Technologists

Hector Ahumada

Hassan Bourija

Christine Brown

Barbara Ferris

Leanne Hadfield

Kylee Hansen

Jeffrey Koford

Sally Kopesec

Amy Lloyd

Radiologic Technologists (continued)

Mindy Lofthouse

Saeed Matinkhah

Virginia May

Shanna Nichols

Alesis Nieves

Misty Oviatt

Nicole Richardson

Angela Lee Rowley

Ellen Sandberg

Radiologic Technologists (continued)

Dave Scholl

Shauna Lyn Seguin

David Shea

Suzanne Smith

Patricia Ann Street

Marcie Walters

Ralph Weiben

Lynly Wilcox

Ray Zisum

**University of Utah Boise Satellite Center, Boise, ID**

---

Co-Principal Investigator

Thomas M. Beck, MD

Study Coordinator

Bonita Wohlers, RN, MS

Administrative Assistant

Kathy Berreth

Lead Radiologist

John S. Waltz, MD

Data Manager

Jill Heinz

Medical Imaging Manager

Jerry Brekke

Physicist

Jeff Fairbanks, PhD

PACS Administrator

Randy Marshall

MI Staff

Kelly Jones

Study Radiologists

Shane Ball, MD

Todd B. Burt, MD

Elaine N. Daniel, MD

Quinn A. DeMordaunt, MD

Michael T. Fisher, MD

Michael A. Fuchs, MD

Bruce E. Hubler, MD

Chris J. Jennings, MD

Richard H. Lane, MD

Craig E. Leymaster, MD

Loren C. Macey, MD

Steven V. Marx, MD

James R. Maxwell, MD

Brent D. Nelson, MD

Radiologic Technologists

Amber Barrow

Douglas Bashford

Barry Clot

Troy Cook

Leslie Dobson

Andrea Hamilton-Foss

William Hanson

Jan E. Hyder

Cindy Lewis-Burke

Radiologic Technologists (continued)

Stacey Mitchell

Marlea Osterhout

Karen Patella

Phillip Peterson

Sandra Schornak-Curtis

Lisa Sirianni

Larry Stoller

Korinna Vigeant

Cheryl Whistle

Jeff Yates

**Washington University School of Medicine, St. Louis, MO**

---

Principal Investigator

Gerald Andriole, MD

Co-Principal Investigator and Lead

Radiologist

David S. Gierada, MD

Physicists

David Engelhart, MS

Glenn Fletcher, PhD

Study Radiologists

D. Claire Anderson, MD

Sanjeev Bhalla, MD

Andrew J. Bierhals, MD

Jason Bronfman, MD

Harvey S. Glazer, MD

Fernando R. Gutierrez, MD

Guillermo Geisse, MD

Lawrence M. Kotner, MD

Cylen Javidan-Nejad, MD

Kianoush Rezai, MD

Stuart S. Sagel, MD

Janice W. Semenkovich, MD

Marilyn J. Siegel, MD

Dallas Sorrel, MD

Pamela K. Woodard, MD

Site Coordinators

Angela Campbell, RT

Vivien Gardner, RN, BSN

Danielle Gherardini, RN, BSN

Lynn Hoese, RN

Ruth Holdener, RT

Louise Ledbetter, RN

Patricia Nieters, RN, BSN

Cynthia Reiners, RN

Jeanine Wade, RT

Mary Wiseman, RN

Study Coordinator

Robin Haverman, RT

Data Manager

Patricia Ruweler

Data Entry Staff

Rochelle Williams

Programming Staff

David Chi

Tim Budd

Lead Abstractors

Sydney Laster

Janise Webb

Medical Records Abstractors

Celia Stolin, RHIT

Medical Record Clerical Staff

Kathy Garrett

Elizabeth Fleming

Biostatistician

Thomas Pilgram, PhD

Clinical Center Staff

Elaine Freesmeier

Jennifer Frye

Deborah Graham

Helen Kaemmerer

JoAnn Nevilles

Kathy Taylor

CT Image Library Staff

James Blaine, DSc

Kenneth Clark, MS, MBA

David Gierada, MD

Paul Koppel, PhD

David Maffitt, MS

CT Image Library Staff (continued)

Stephen Moore, MS

Joan Moulton

Stanley Phillips

Fred Prior, PhD

Mary Wolfsberger

Telephone and Recruitment Staff

Amy Haas

Divine Hartwell

Dana Roeshe

Administrative Support Staff

Adelheid Lowery, RN

Shelly Meese

Kate Naughton

Roberta Yoffie, RT

CTIL Image Viewers

Angela Cosas

Sooah Kim, MD

Miyoung Kim, MD

Yuting Liang, MD

Patricia Ruweler

Rochelle Williams

Imaging Quality Assurance

James Blaine, DSc

Kenneth Clark, MS, MBA

Paul Koppel, PhD

David Maffitt, MS

Stephen Moore, MS

Fred Prior, PhD

Stanley Phillips

Kirk Smith
